# Supplementary material for: Merocyanines based on 1,2-diphenyl-3,5-pyrazolidinedione
Source: Royal Society of Chemistry journal article supplement (doi:10.1039/c9nj03275d), 2019-01-01

|                 |              |         |                |
|-----------------|--------------|---------|----------------|
| Frequency (MHz) | 299.95       | Nucleus | <sup>1</sup> H |
| Solvent         | CHLOROFORM-d |         |                |

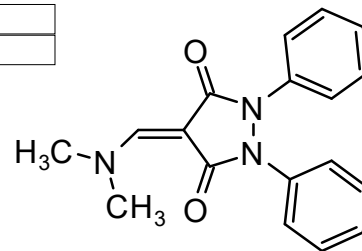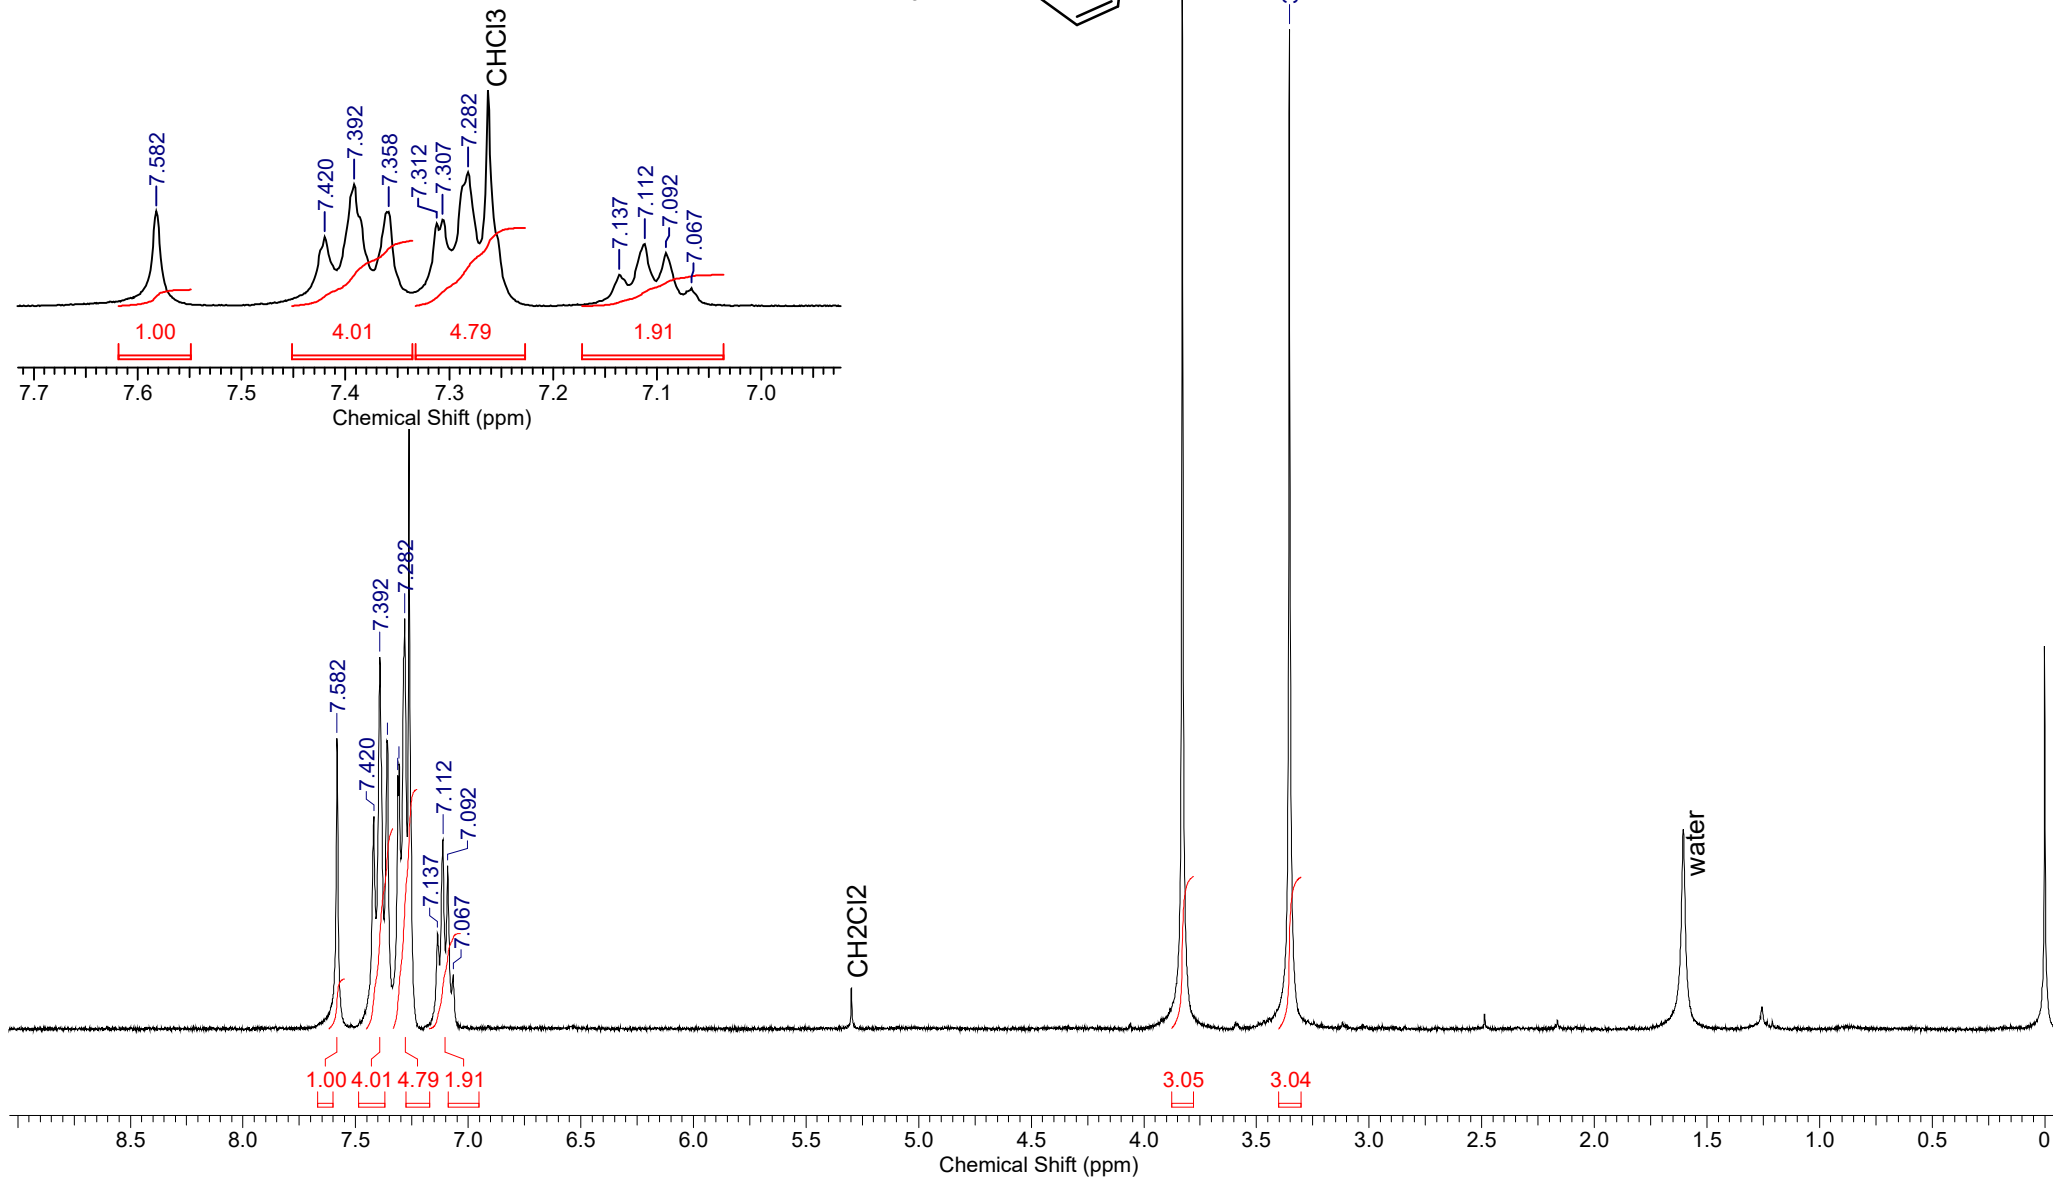

|                 |              |         |                |
|-----------------|--------------|---------|----------------|
| Frequency (MHz) | 299.95       | Nucleus | <sup>1</sup> H |
| Solvent         | CHLOROFORM-d |         |                |

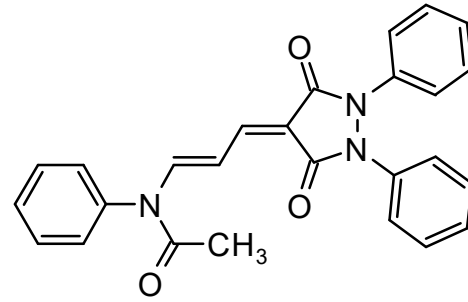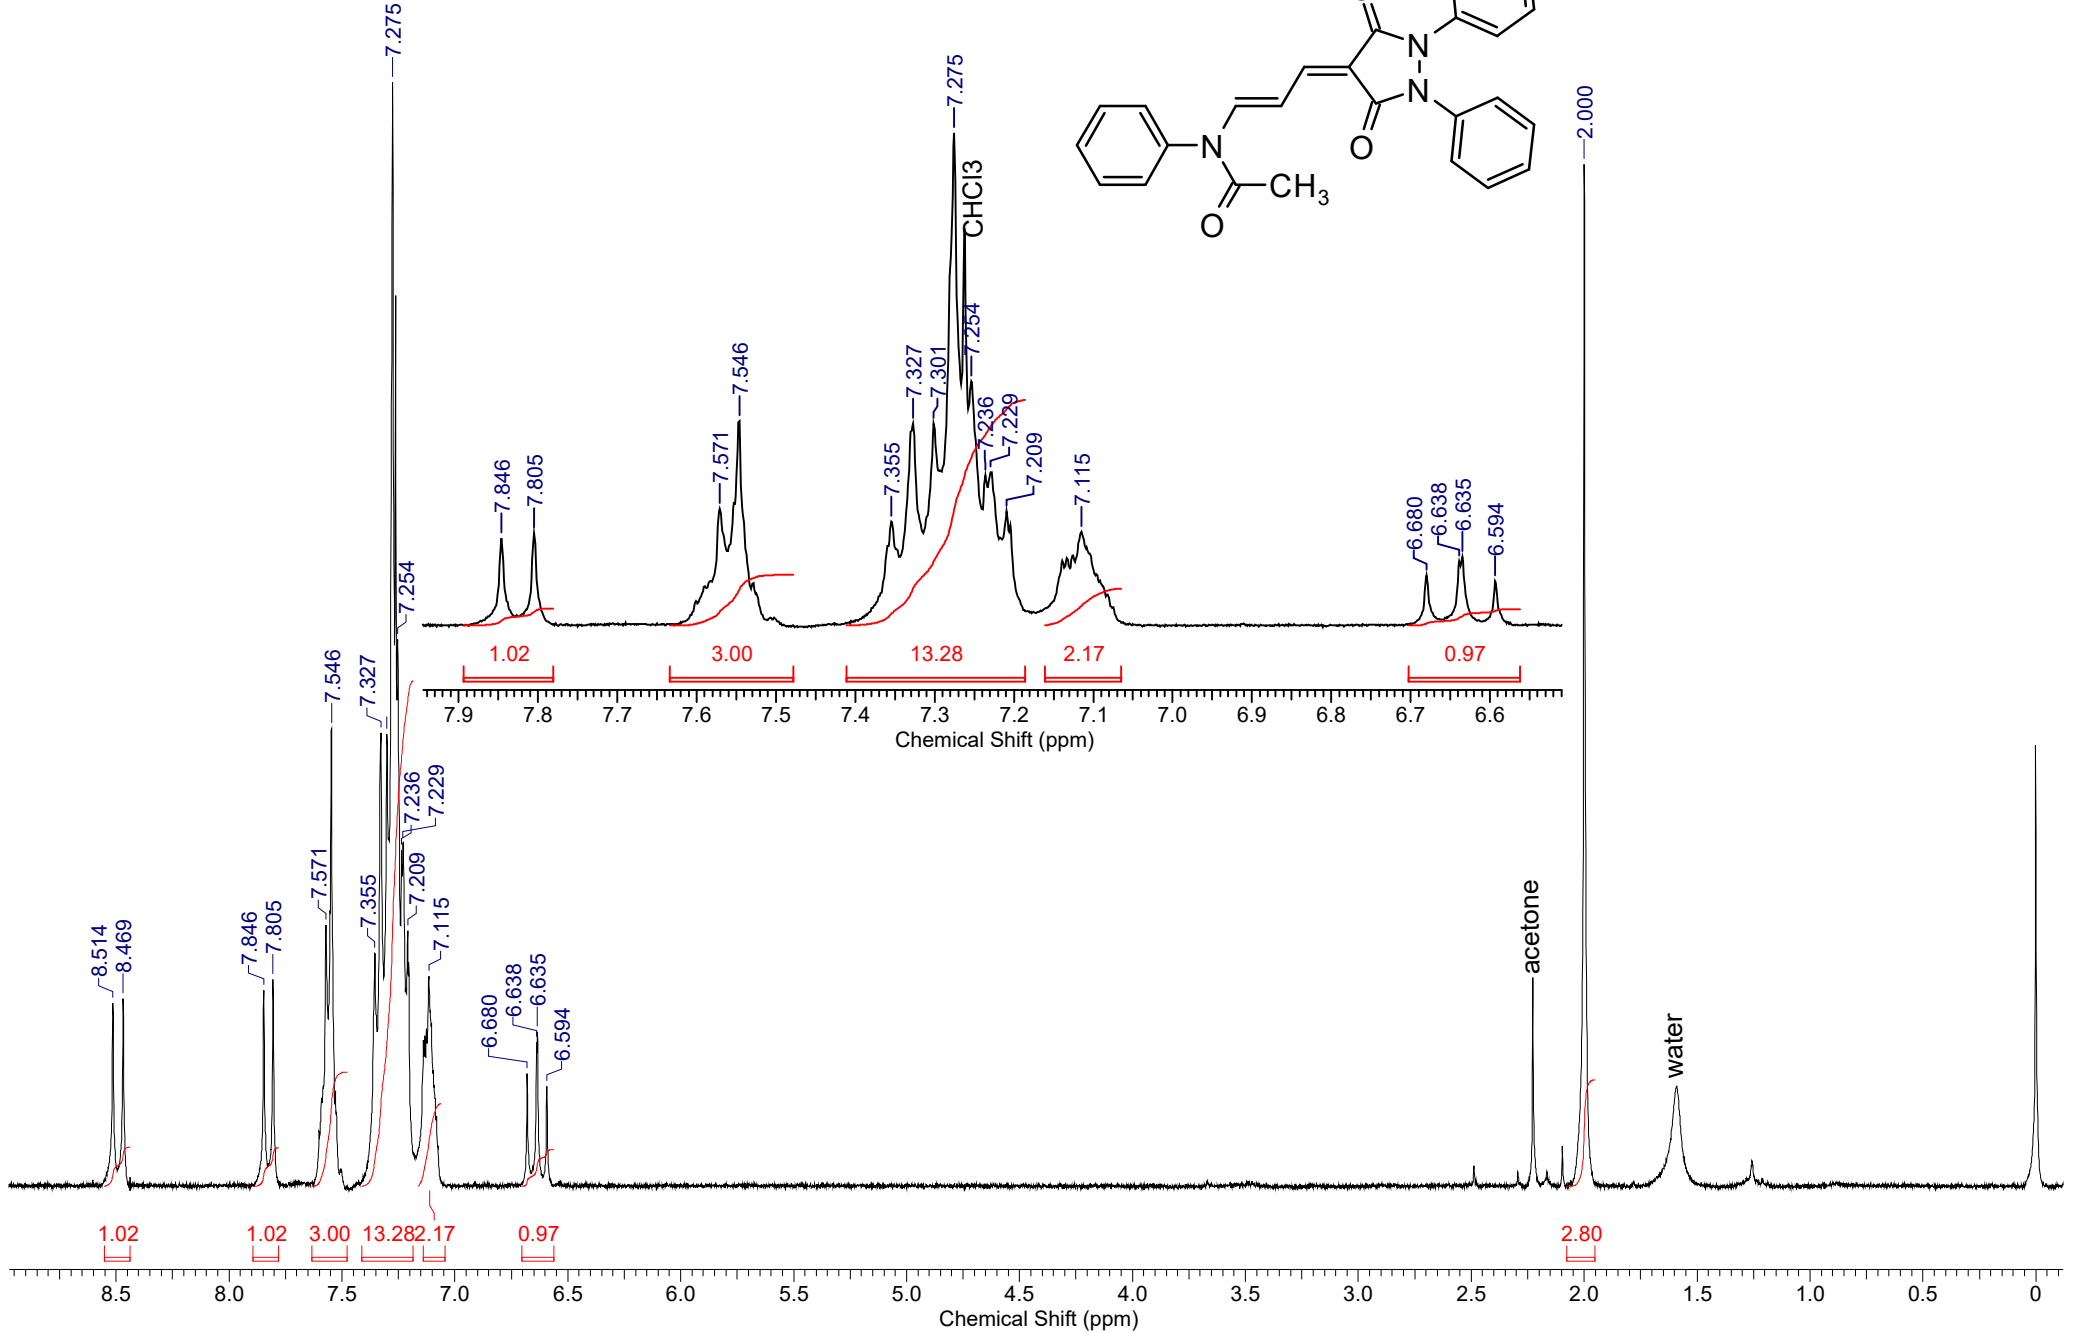

|                 |              |         |    |
|-----------------|--------------|---------|----|
| Frequency (MHz) | 299.95       | Nucleus | 1H |
| Solvent         | CHLOROFORM-d |         |    |

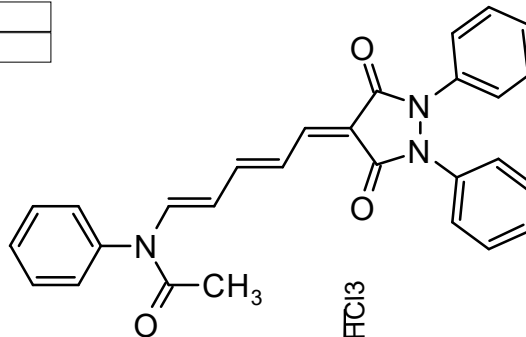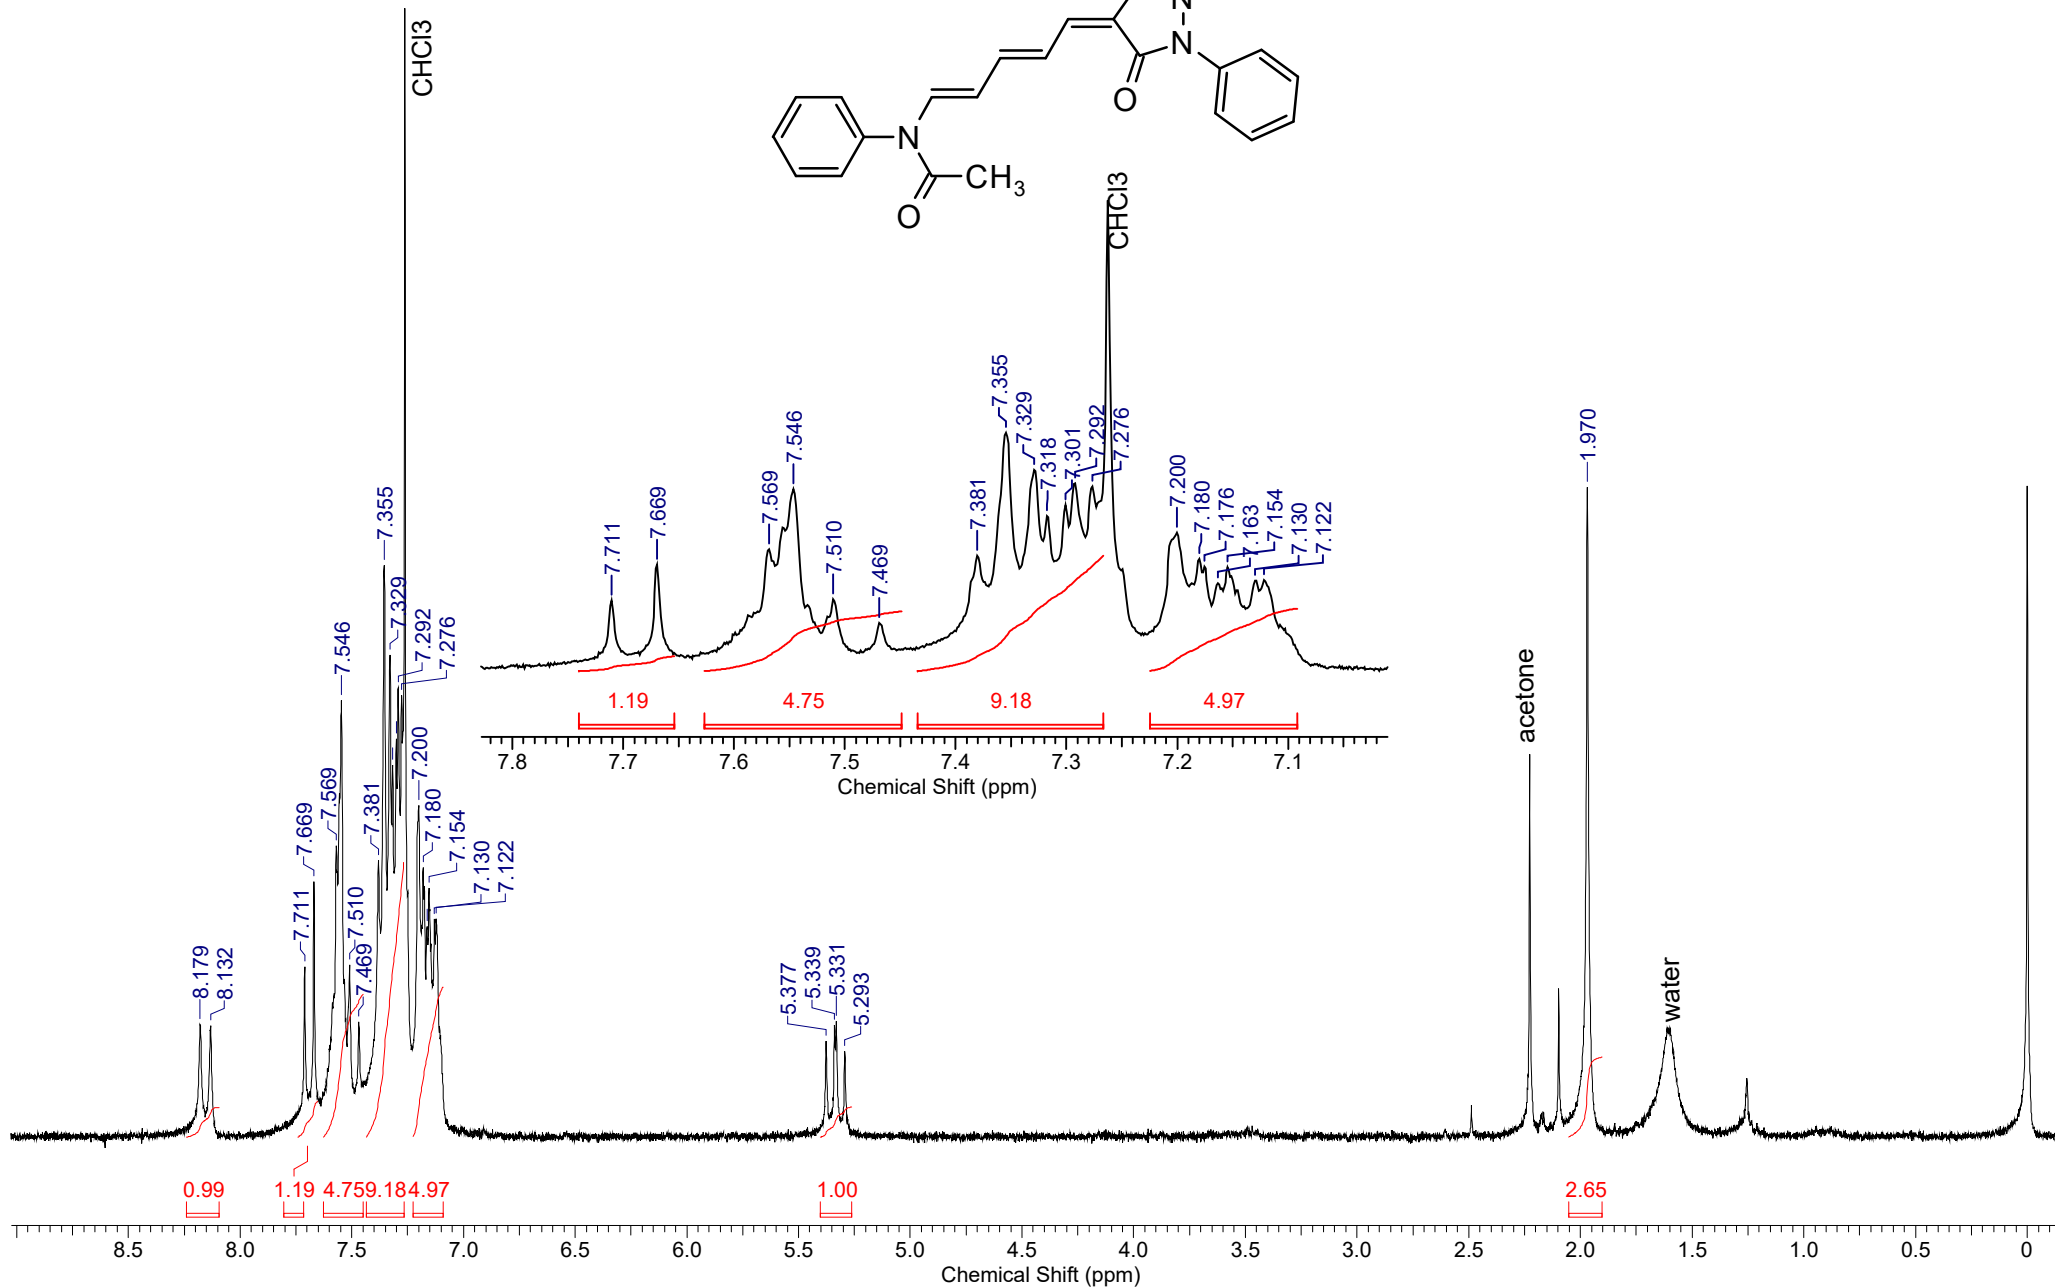

|                        |              |                |    |
|------------------------|--------------|----------------|----|
| <b>Frequency (MHz)</b> | 299.95       | <b>Nucleus</b> | 1H |
| <b>Solvent</b>         | CHLOROFORM-d |                |    |

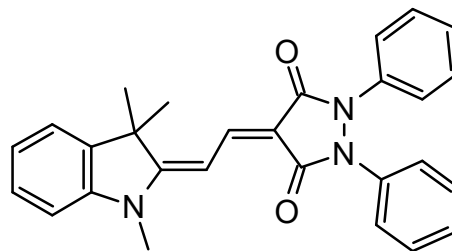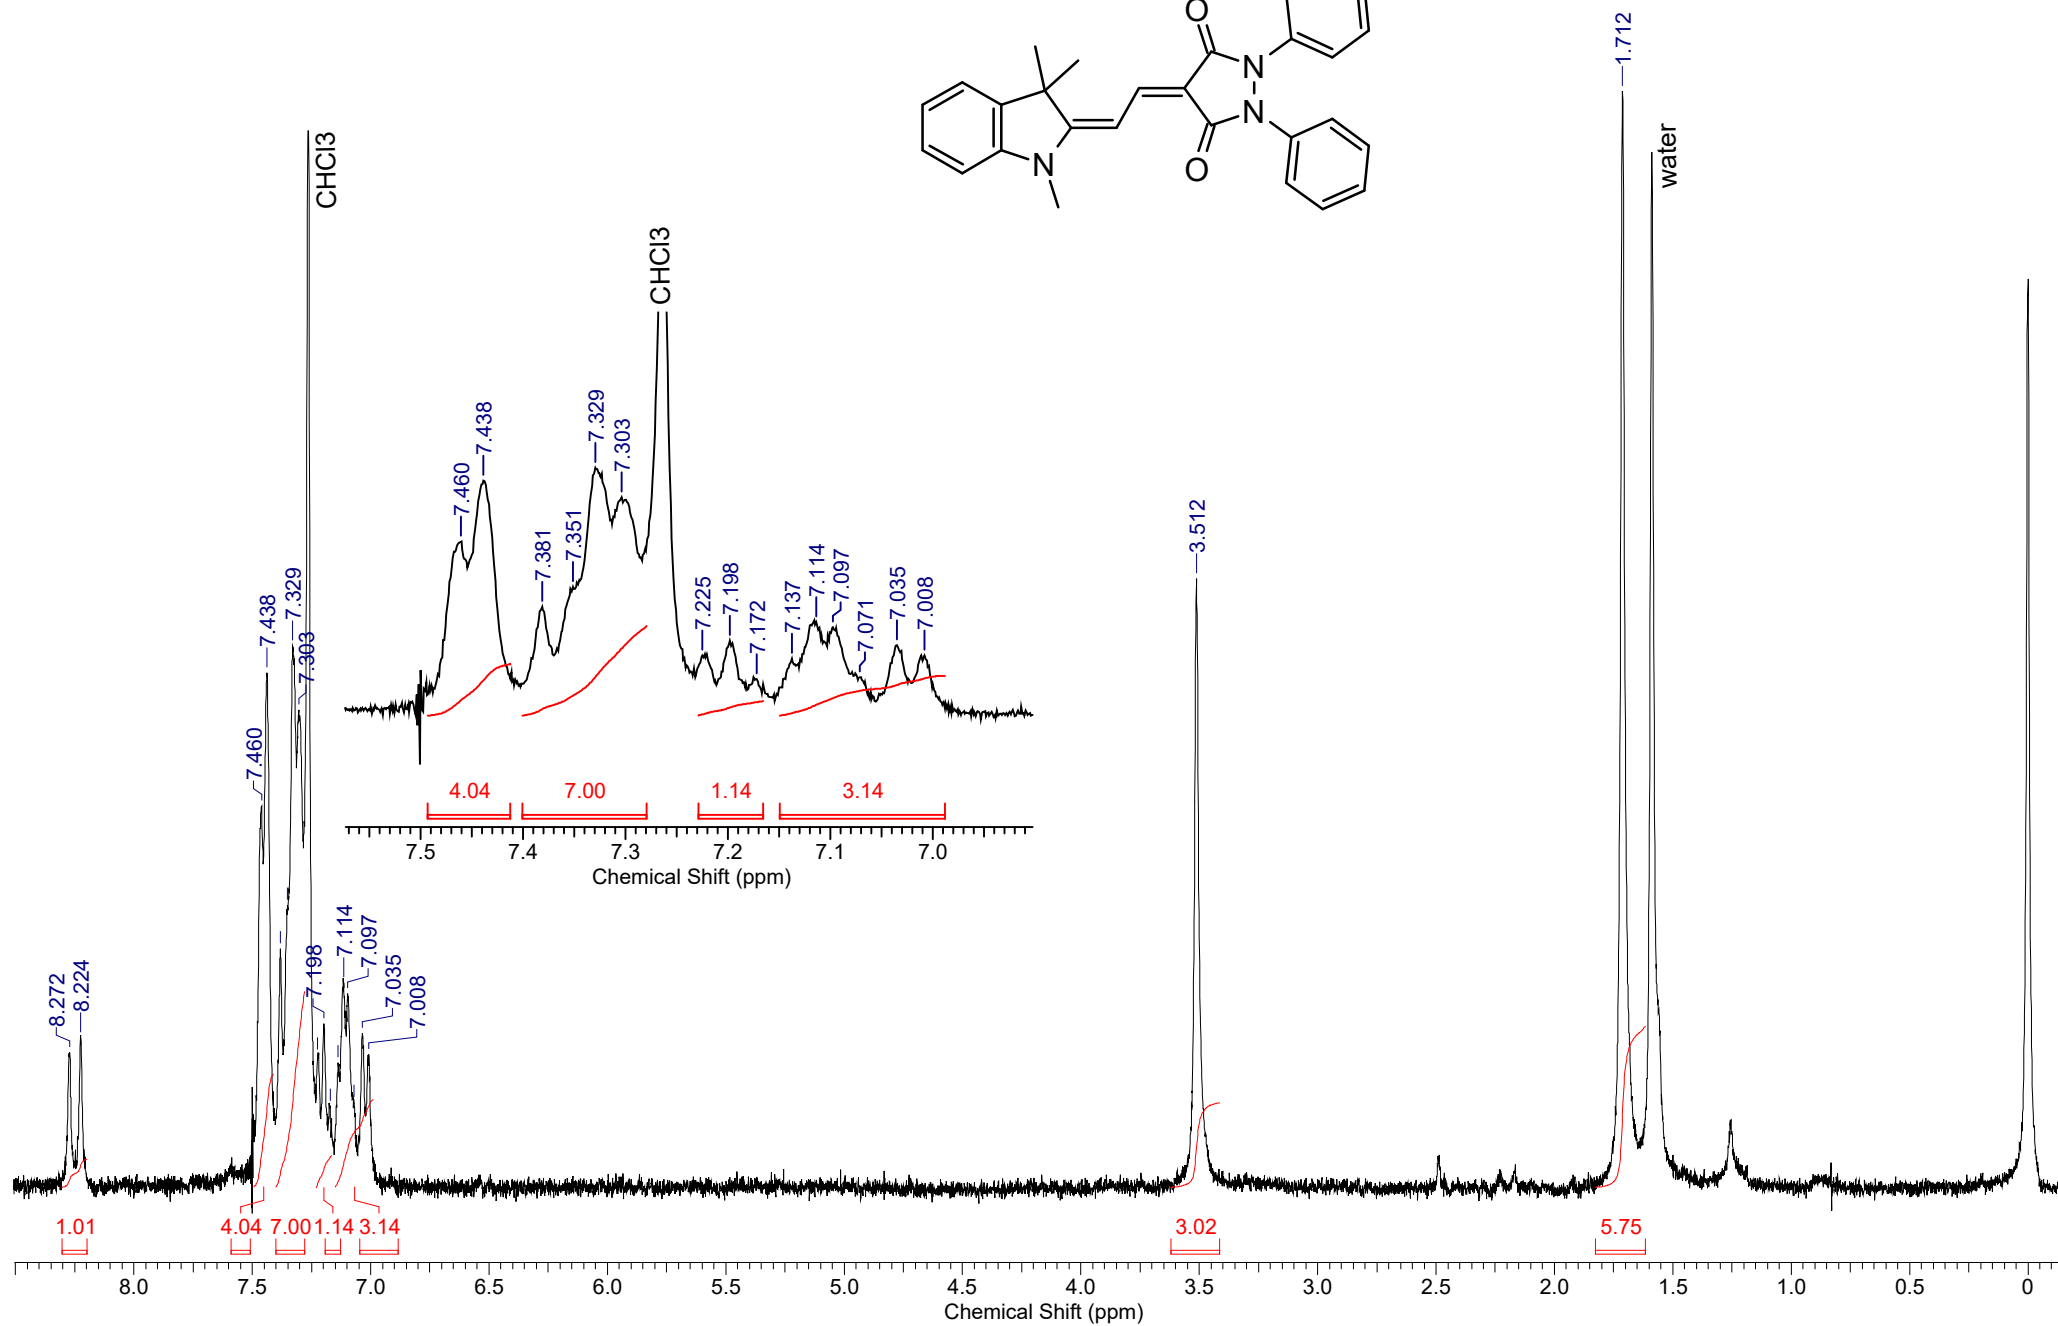

|                 |              |         |                |
|-----------------|--------------|---------|----------------|
| Frequency (MHz) | 299.95       | Nucleus | <sup>1</sup> H |
| Solvent         | CHLOROFORM-d |         |                |

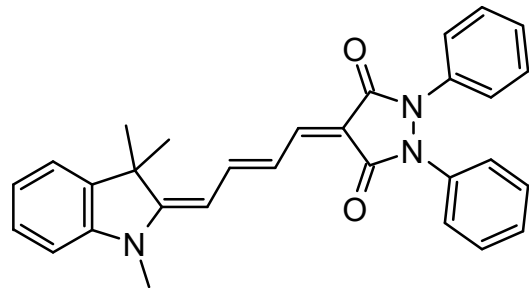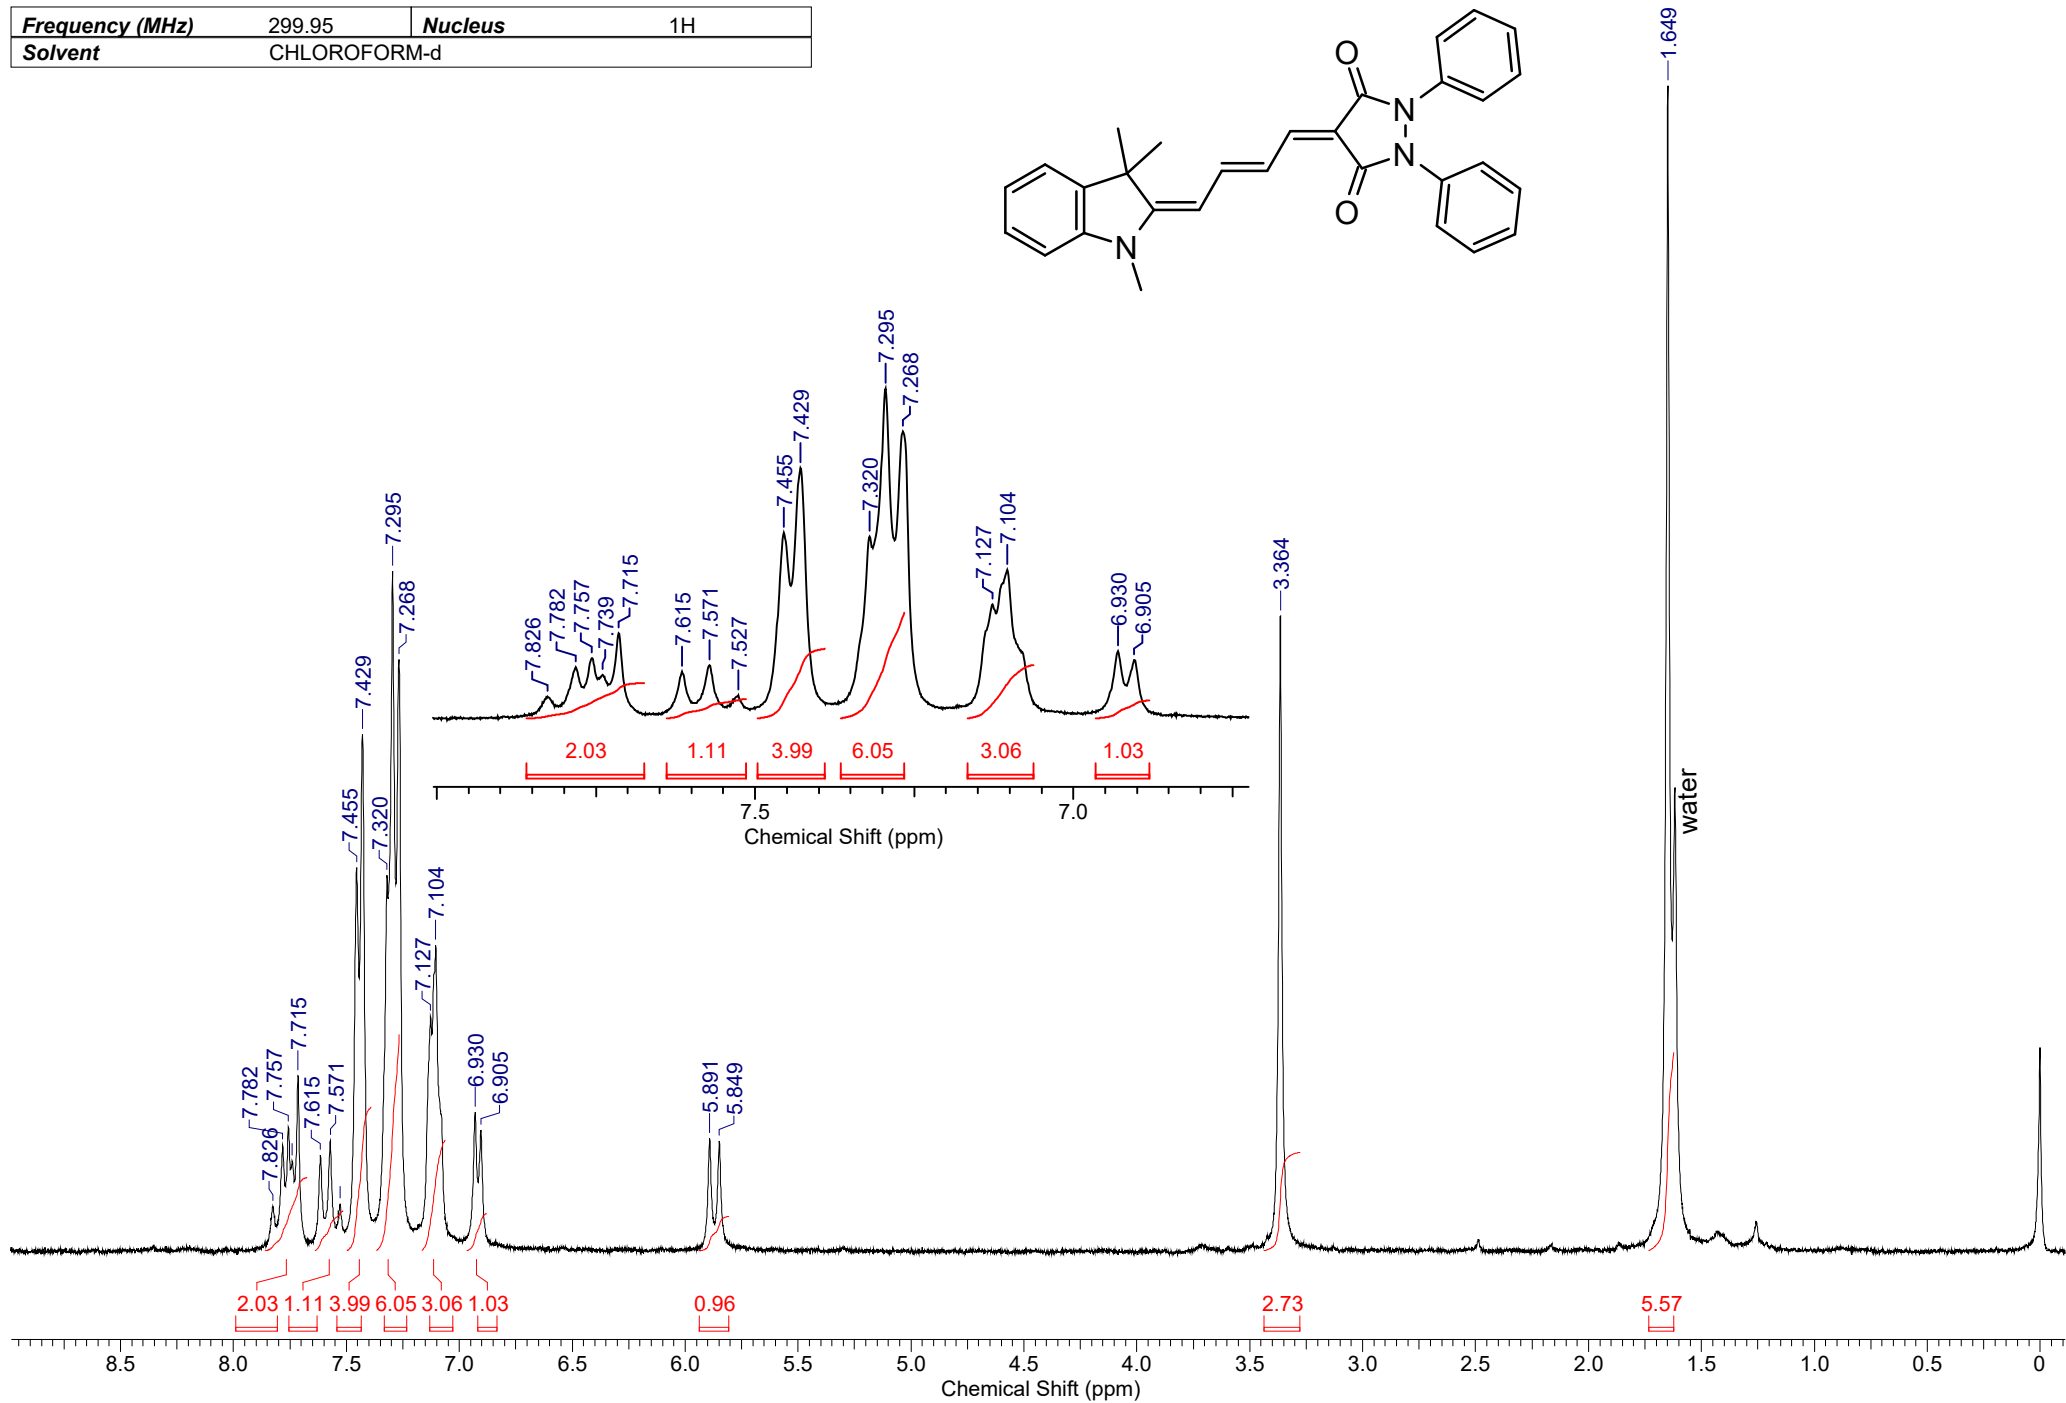

|                 |              |         |    |
|-----------------|--------------|---------|----|
| Frequency (MHz) | 299.95       | Nucleus | 1H |
| Solvent         | CHLOROFORM-d |         |    |

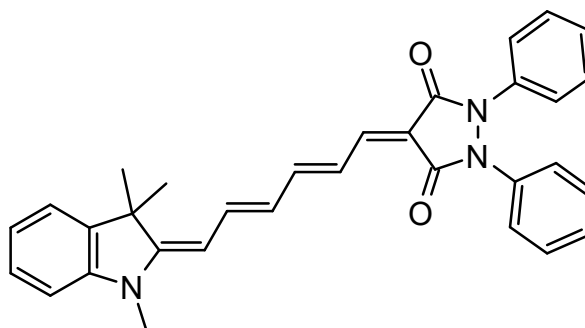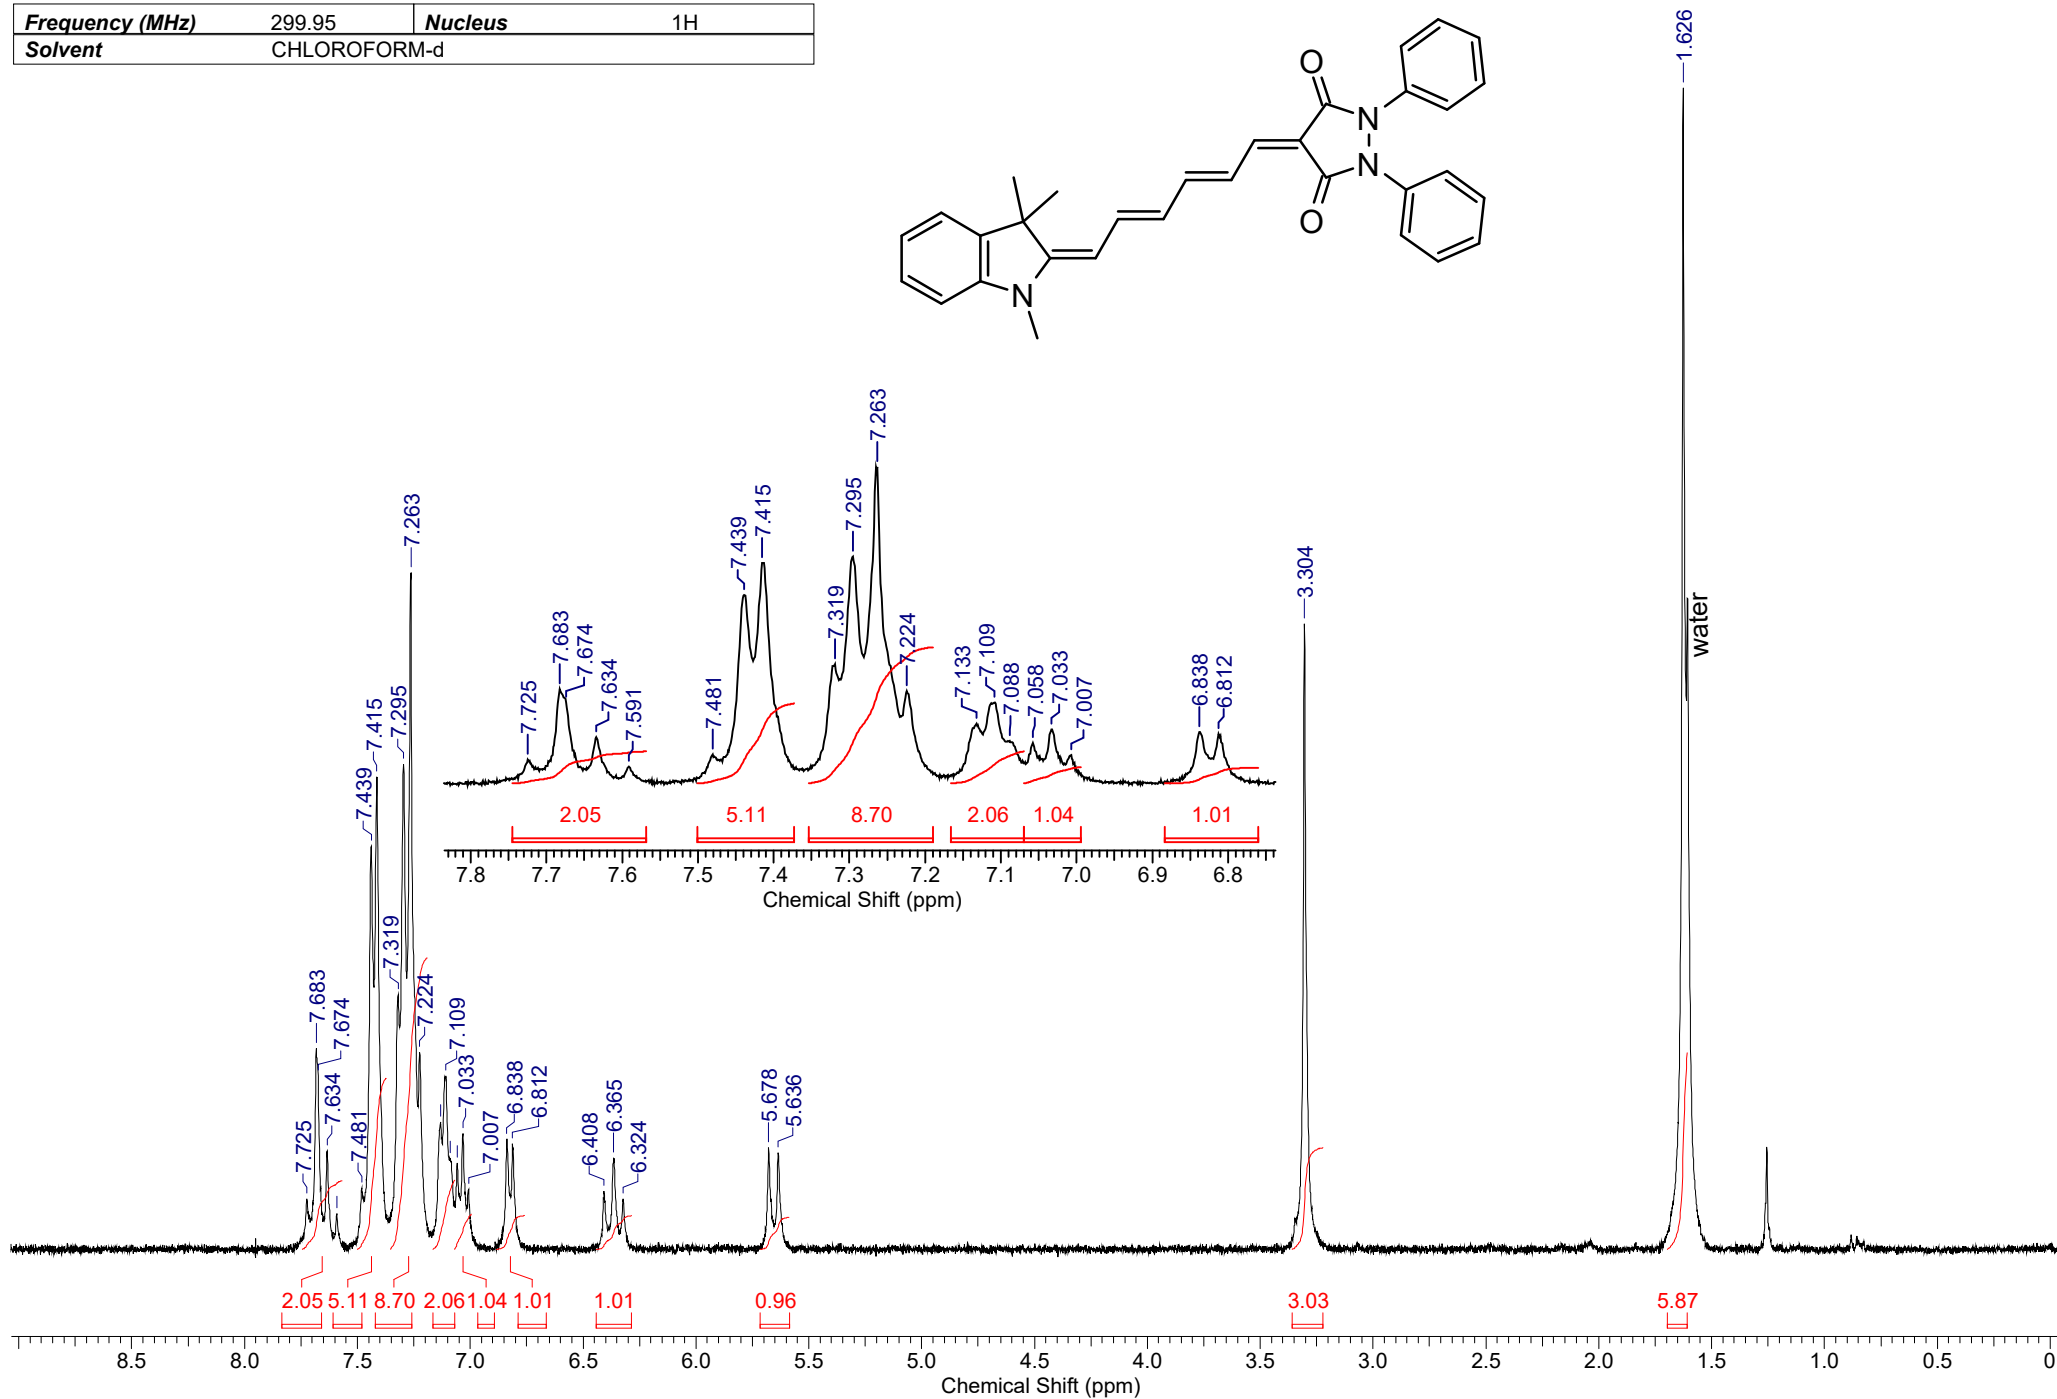

|                 |         |         |    |
|-----------------|---------|---------|----|
| Frequency (MHz) | 299.95  | Nucleus | 1H |
| Solvent         | DMSO-d6 |         |    |

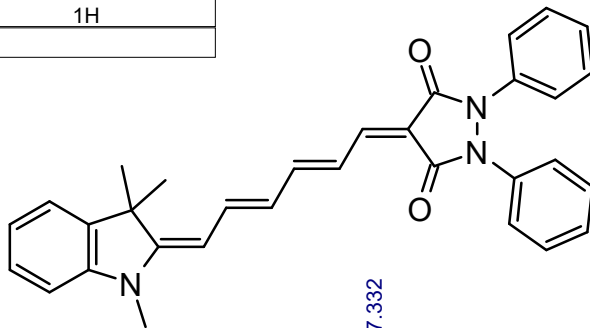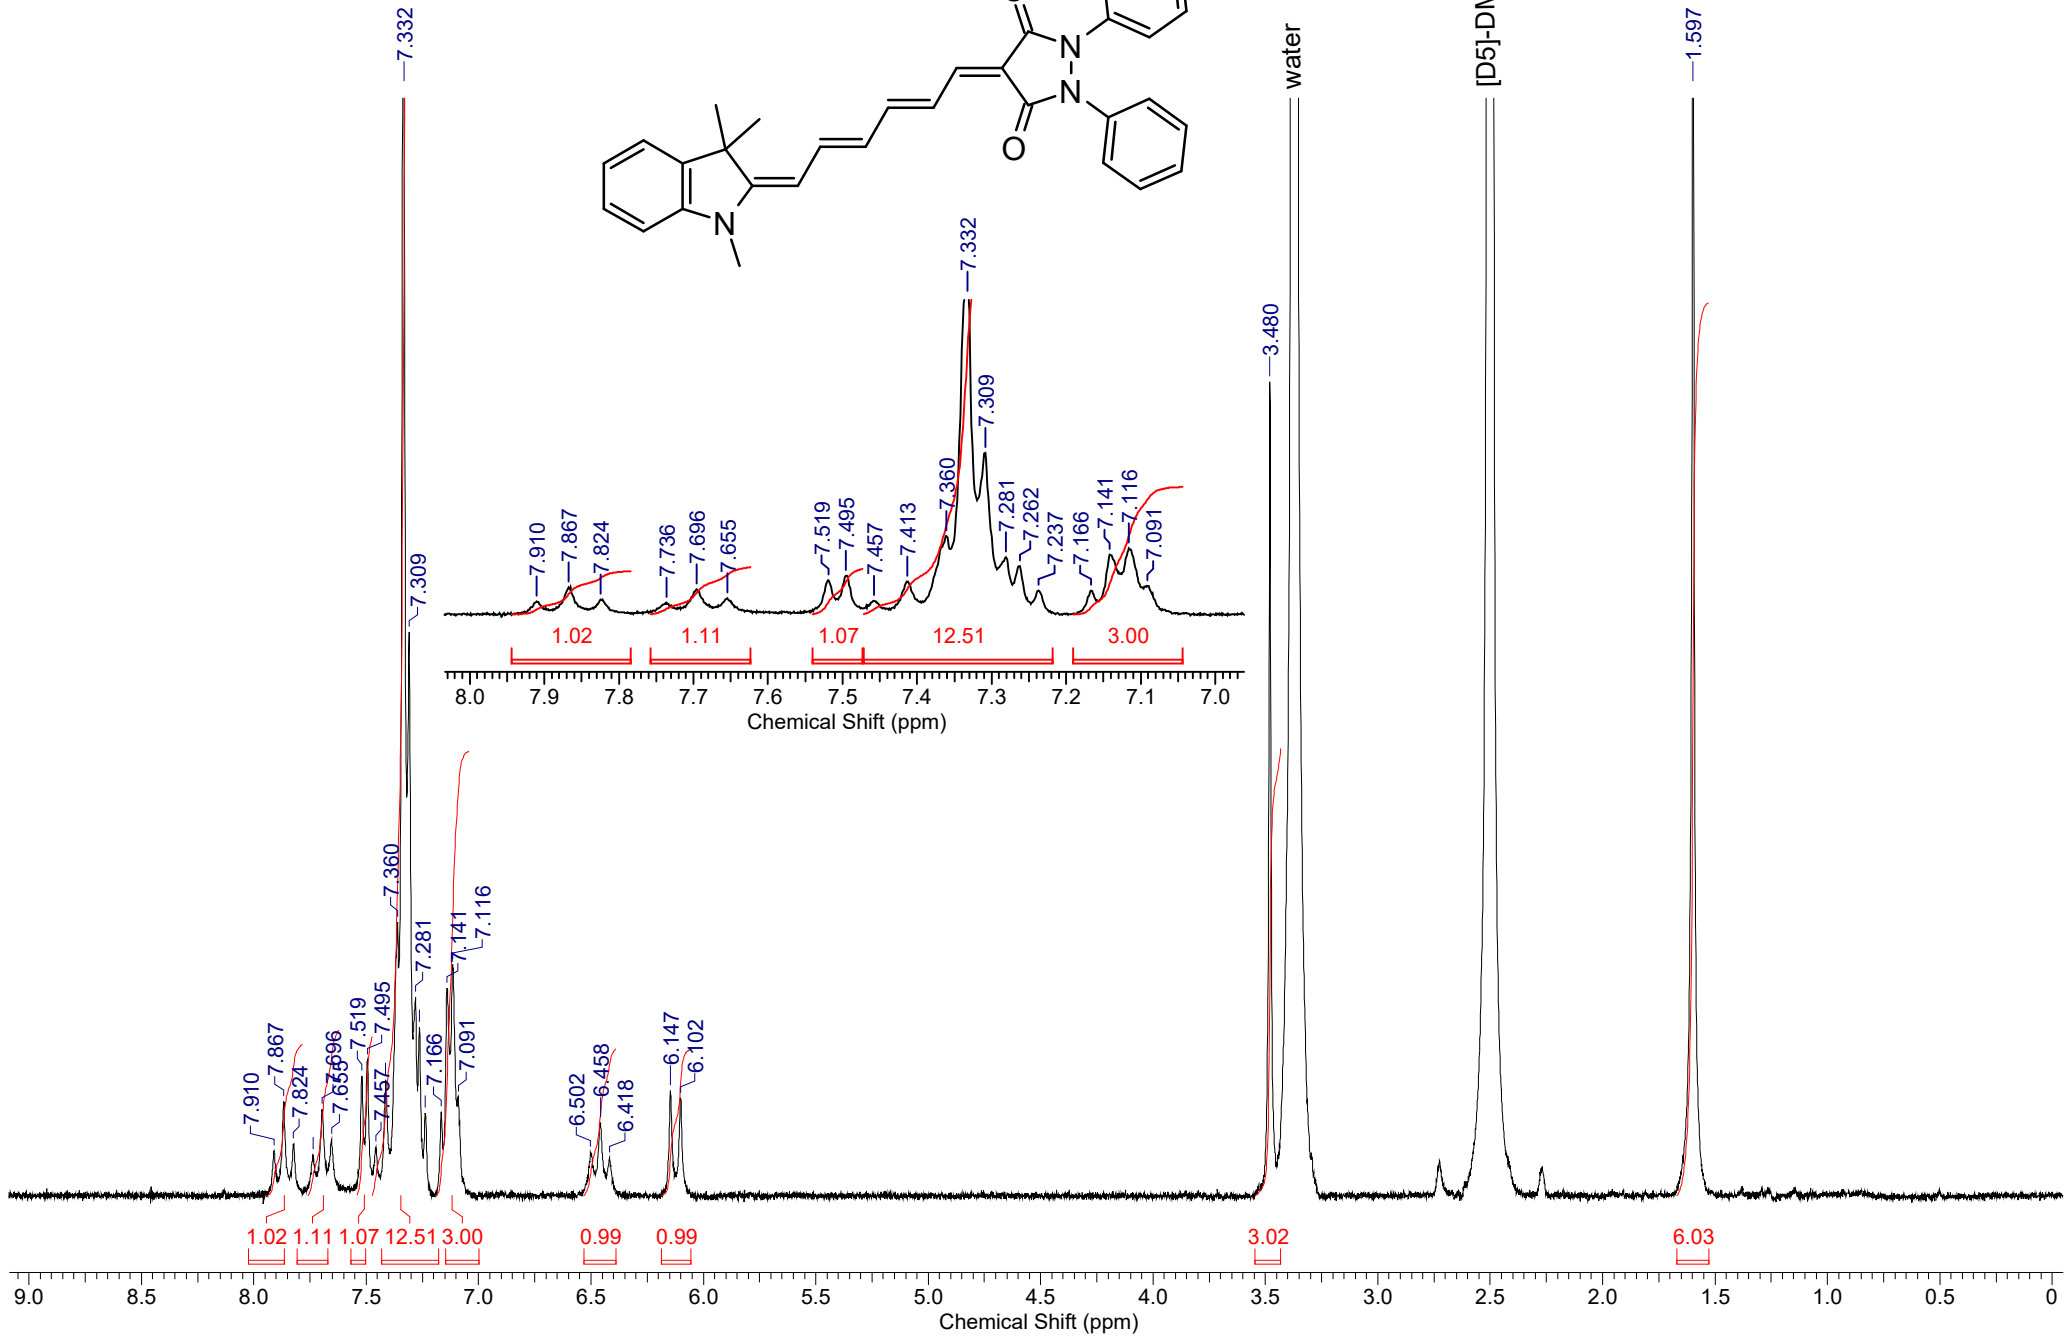

|                 |              |         |    |
|-----------------|--------------|---------|----|
| Frequency (MHz) | 299.95       | Nucleus | 1H |
| Solvent         | CHLOROFORM-d |         |    |

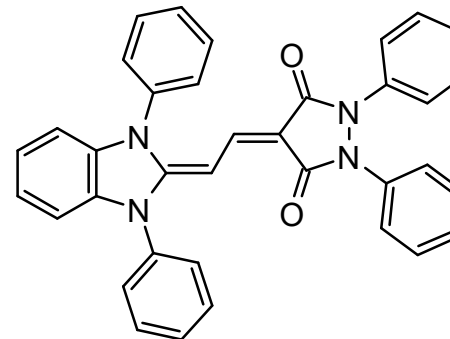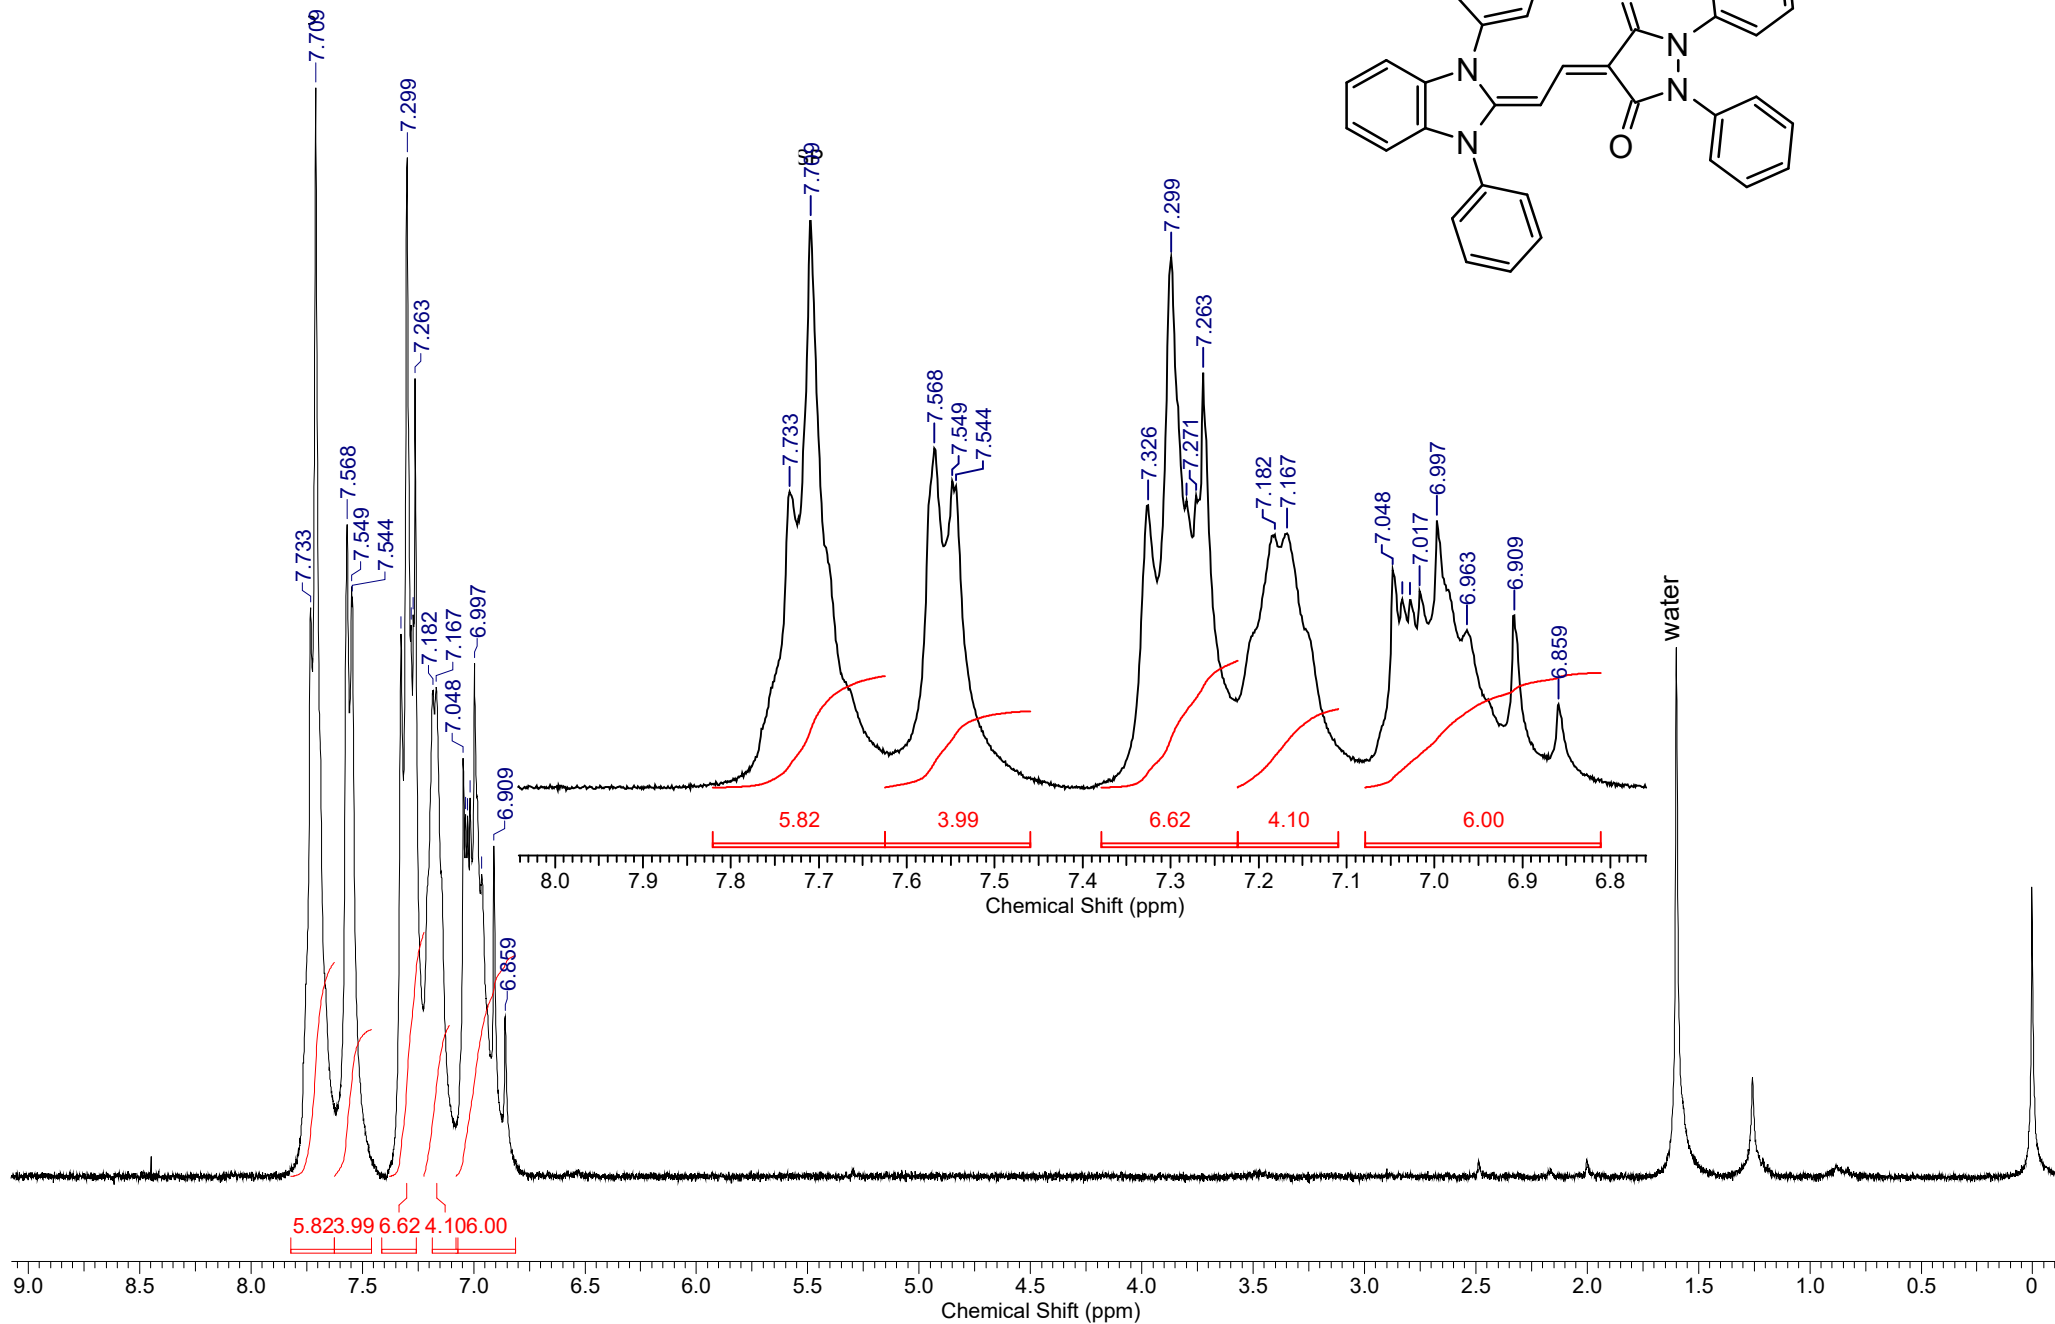



|                        |         |                |    |
|------------------------|---------|----------------|----|
| <b>Frequency (MHz)</b> | 299.95  | <b>Nucleus</b> | 1H |
| <b>Solvent</b>         | DMSO-d6 |                |    |

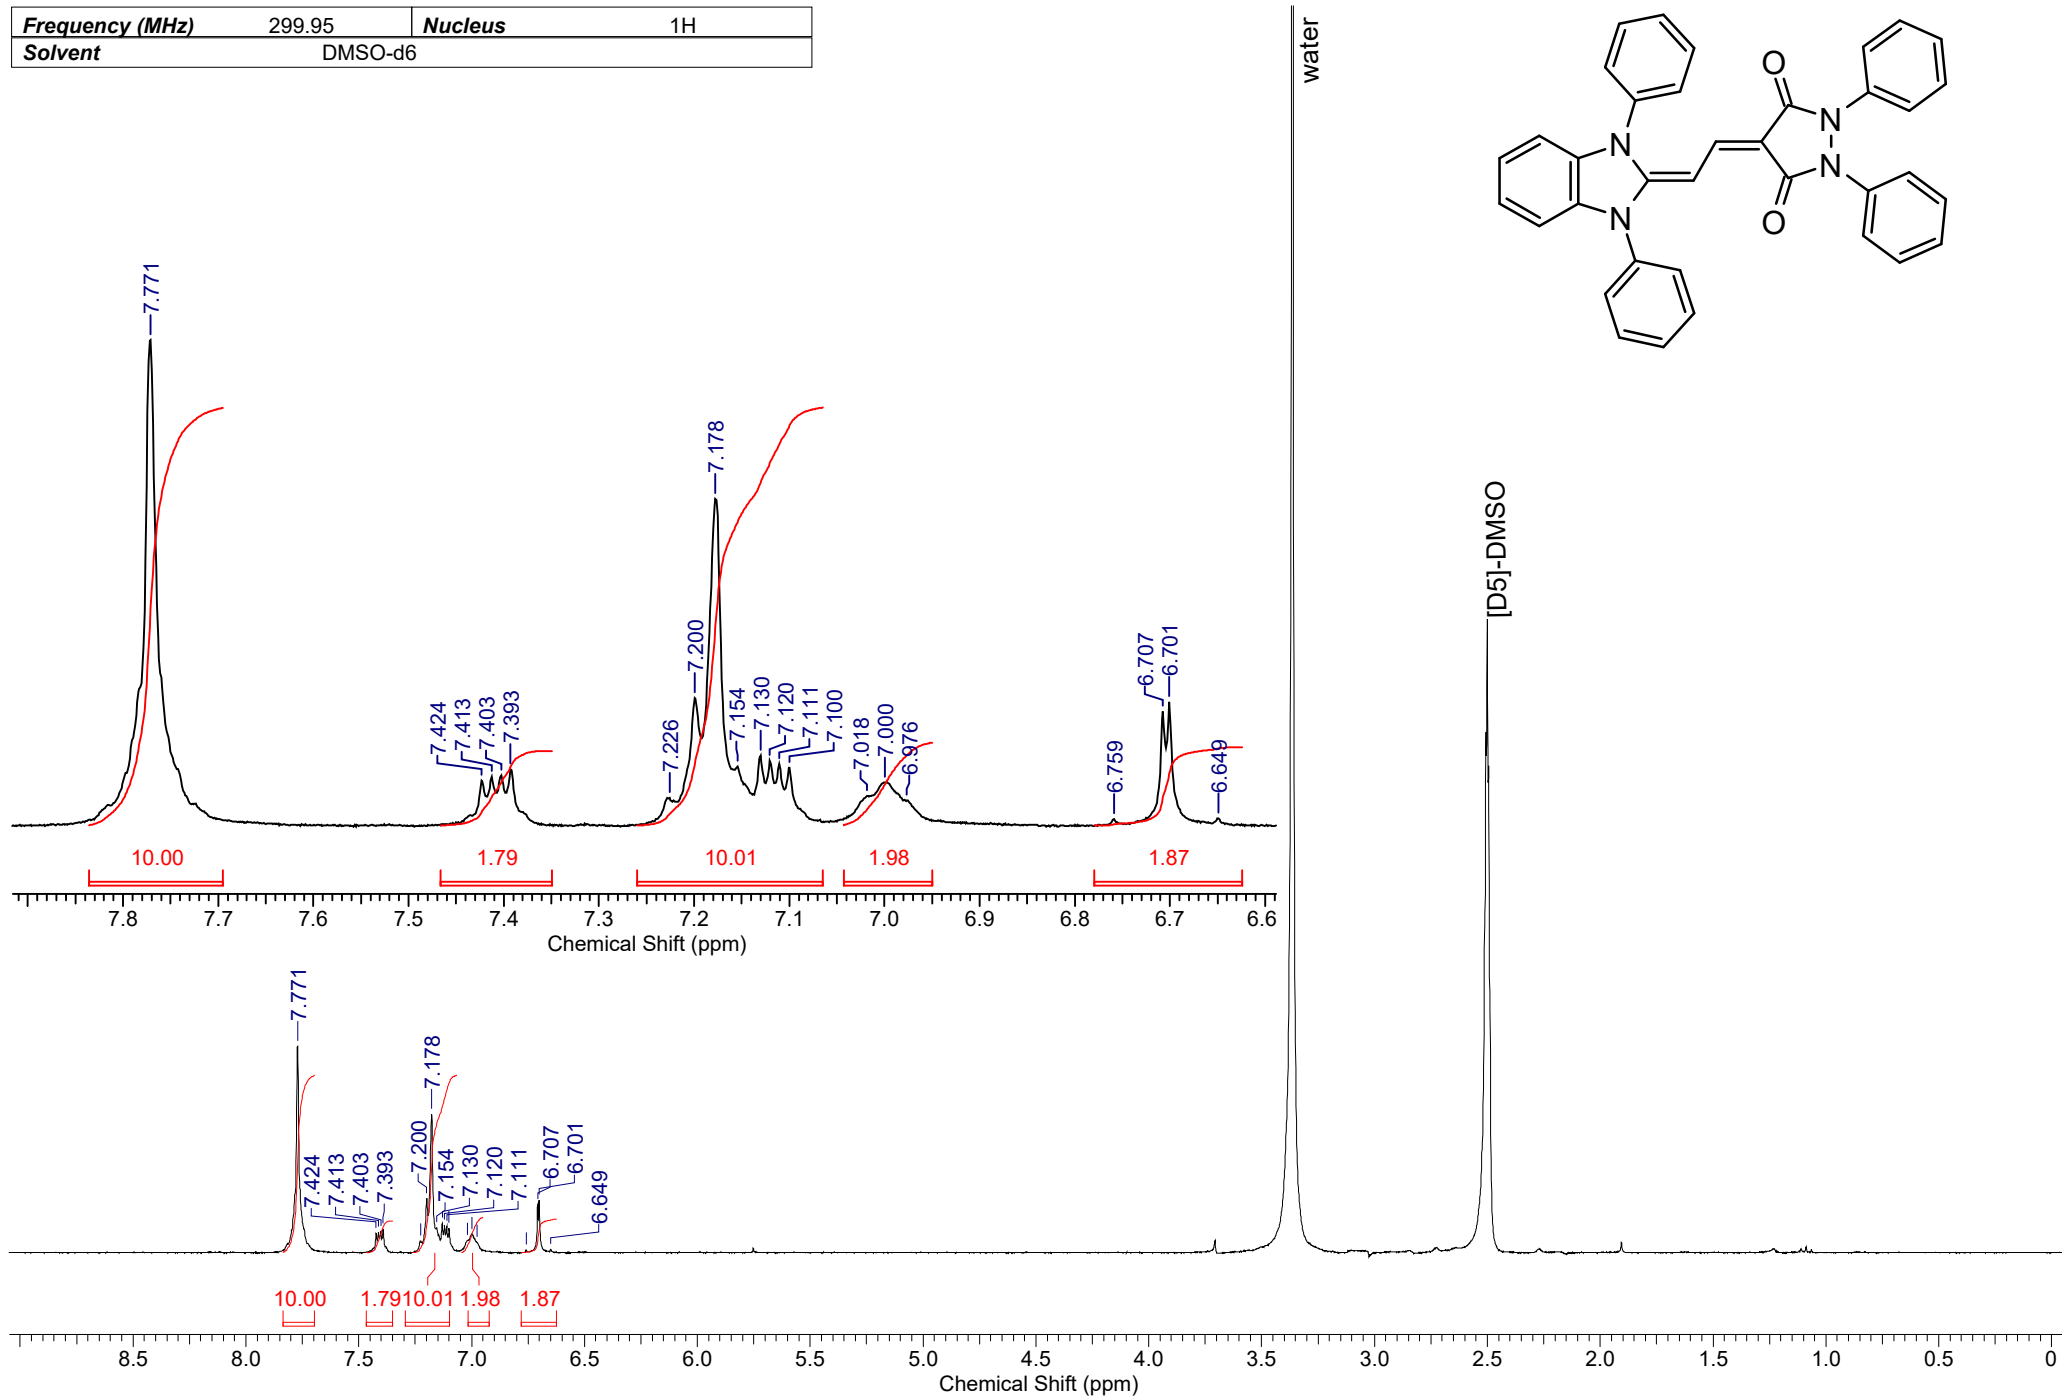

|                 |              |         |    |
|-----------------|--------------|---------|----|
| Frequency (MHz) | 299.95       | Nucleus | 1H |
| Solvent         | CHLOROFORM-d |         |    |

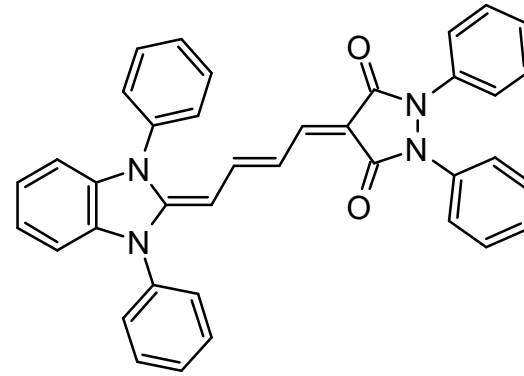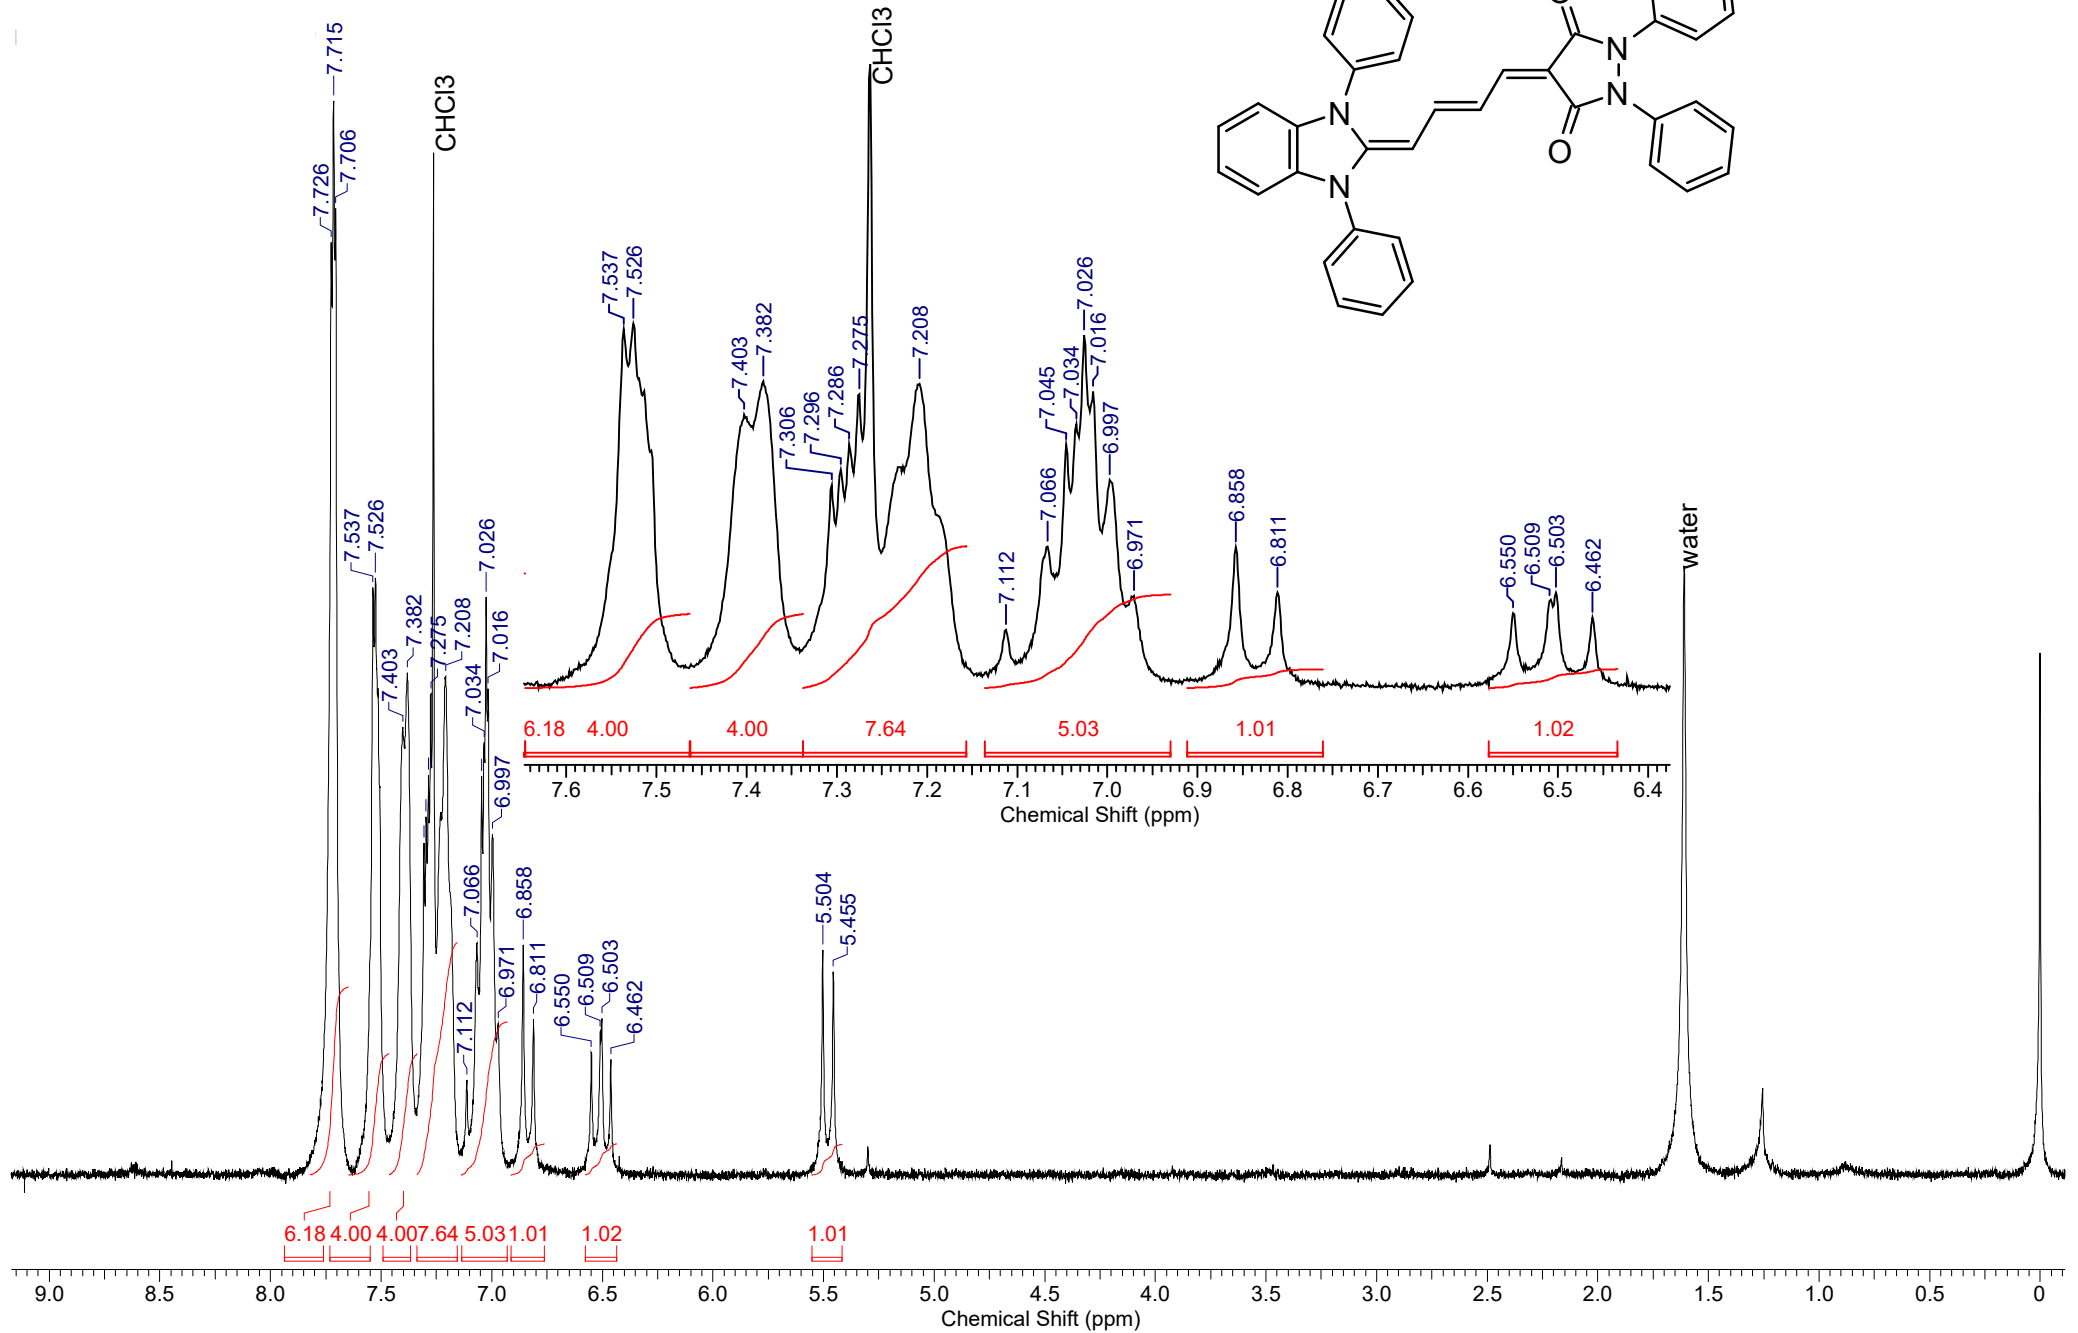



|                        |              |                |                |
|------------------------|--------------|----------------|----------------|
| <b>Frequency (MHz)</b> | 299.95       | <b>Nucleus</b> | <sup>1</sup> H |
| <b>Solvent</b>         | CHLOROFORM-d |                |                |

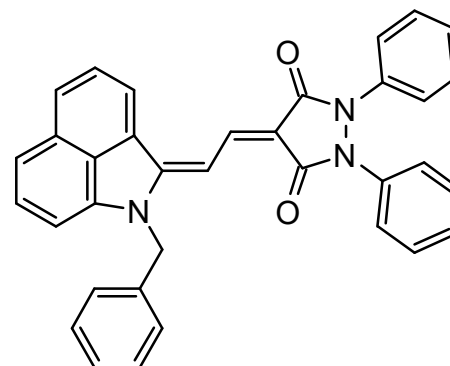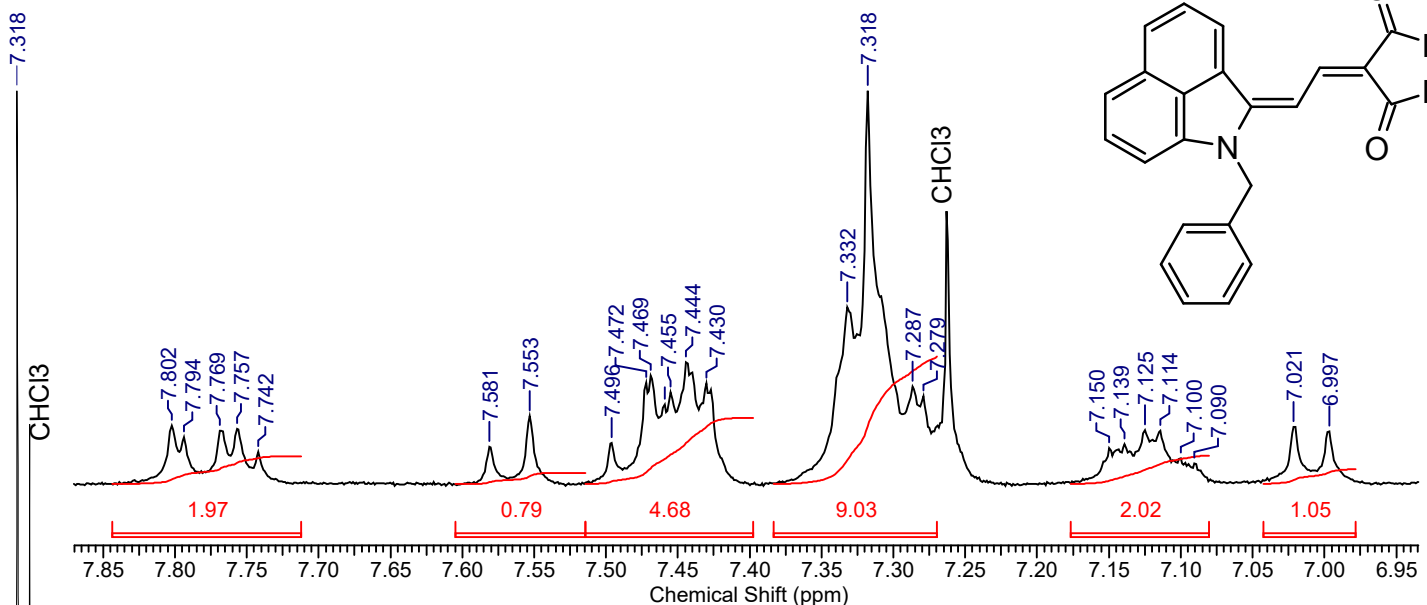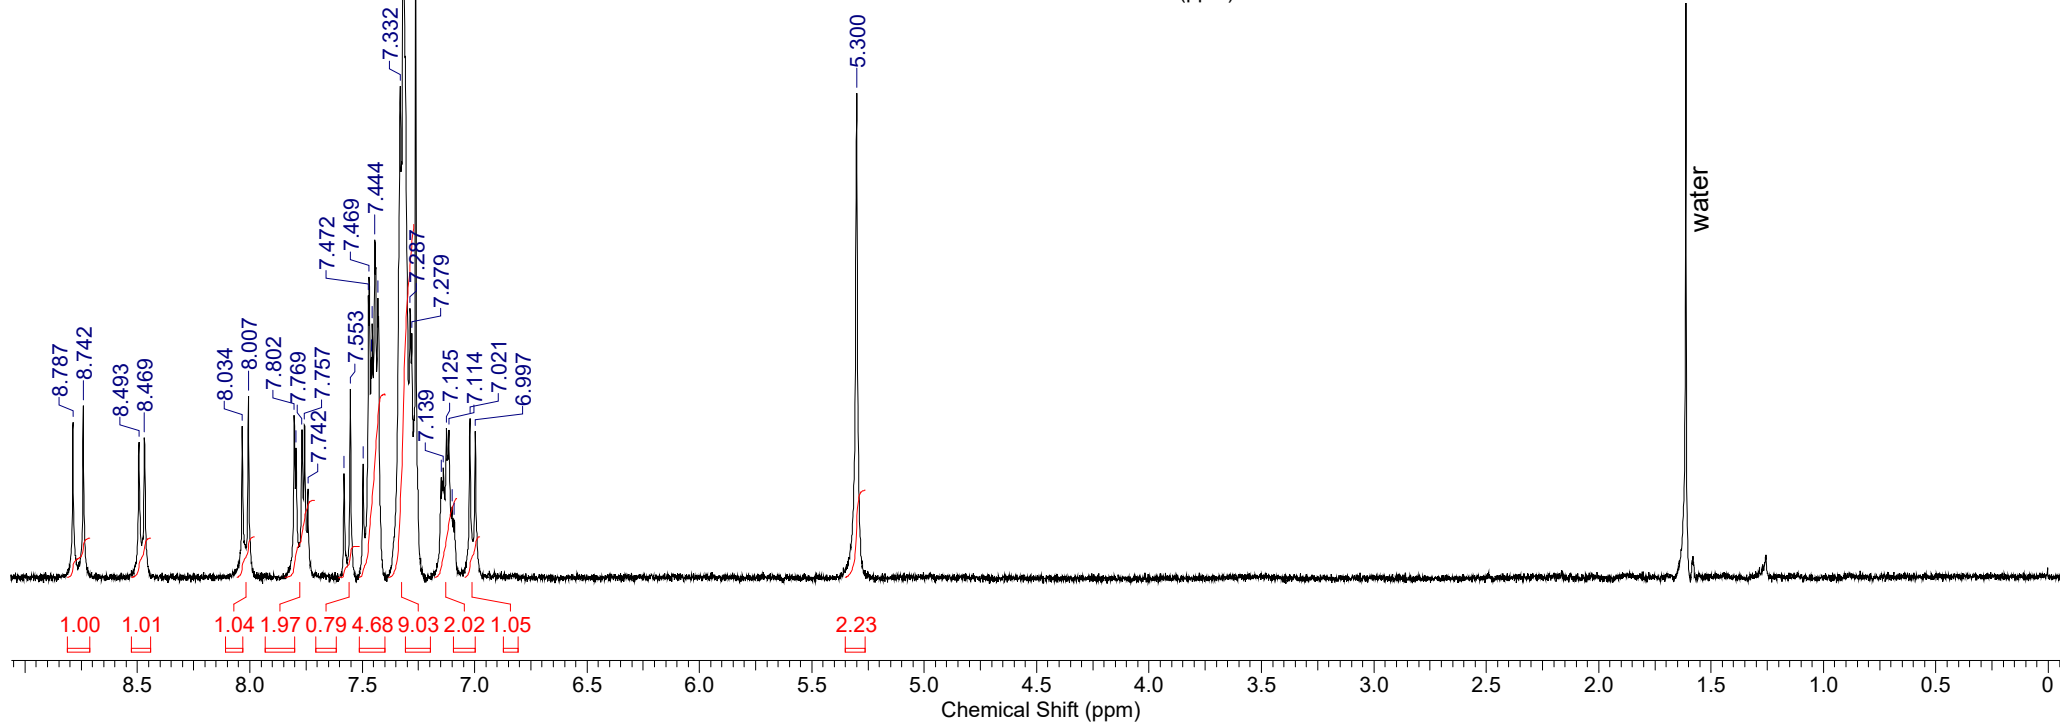

|                        |         |                |                |
|------------------------|---------|----------------|----------------|
| <b>Frequency (MHz)</b> | 299.95  | <b>Nucleus</b> | <sup>1</sup> H |
| <b>Solvent</b>         | DMSO-d6 |                |                |

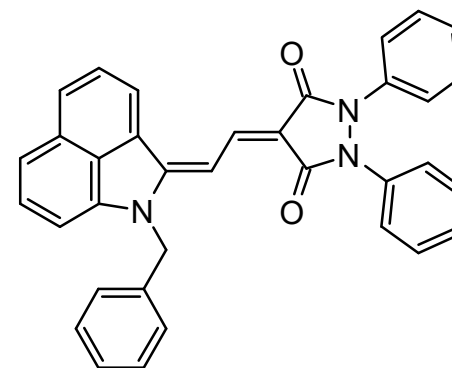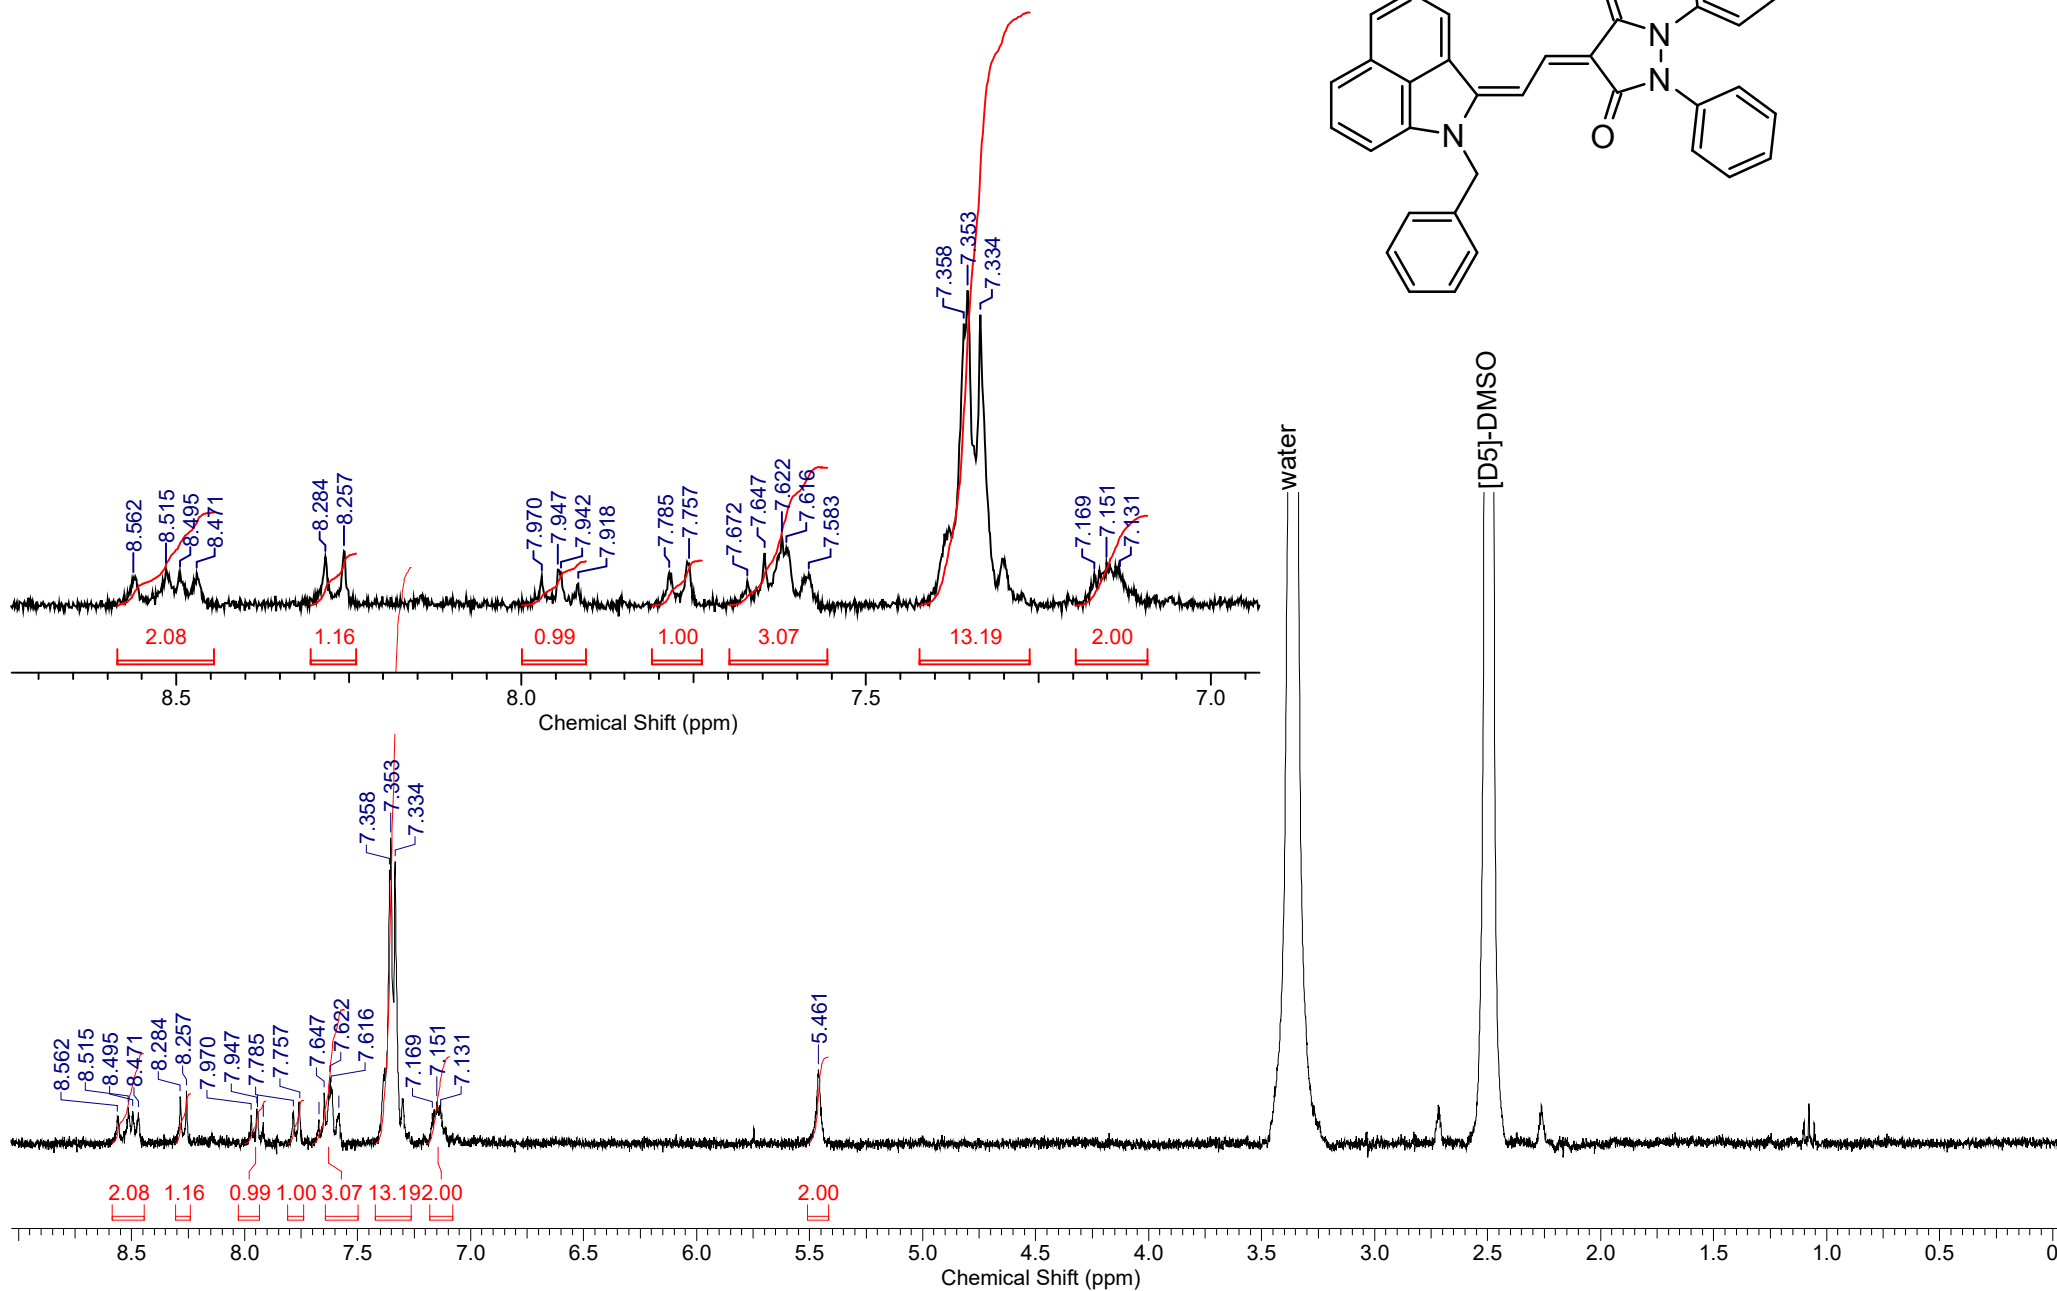

|                 |         |         |                |
|-----------------|---------|---------|----------------|
| Frequency (MHz) | 299.95  | Nucleus | <sup>1</sup> H |
| Solvent         | DMSO-d6 |         |                |

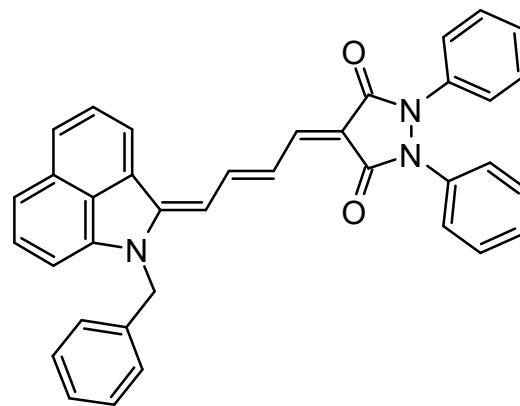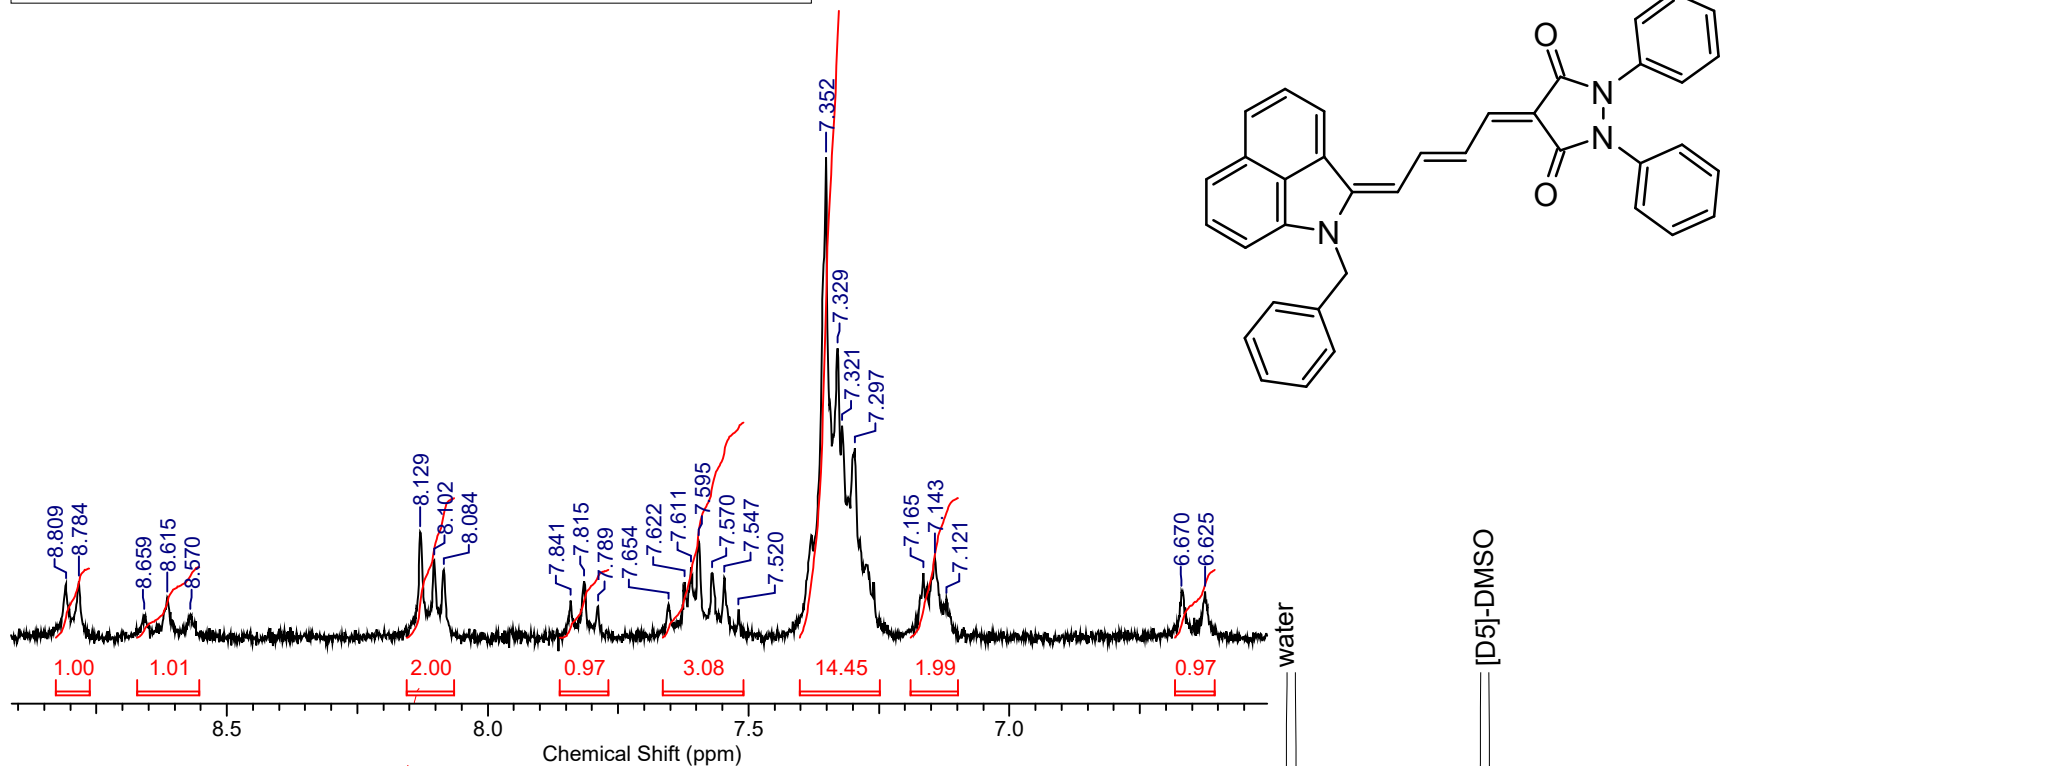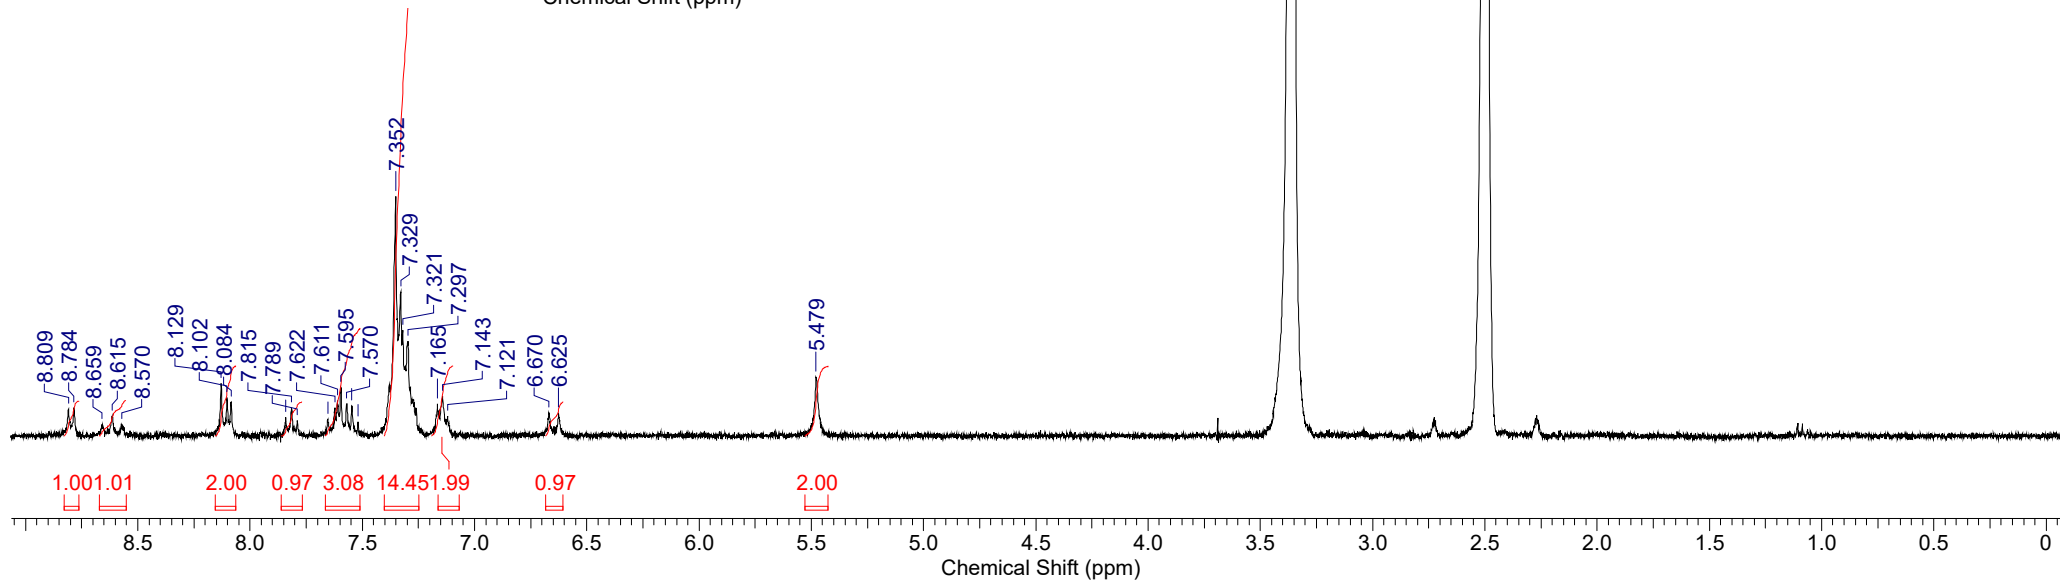



|                        |         |                |                |
|------------------------|---------|----------------|----------------|
| <b>Frequency (MHz)</b> | 400.08  | <b>Nucleus</b> | <sup>1</sup> H |
| <b>Solvent</b>         | DMSO-d6 |                |                |

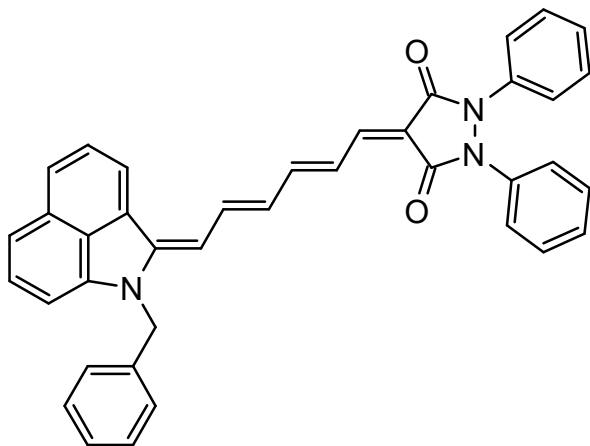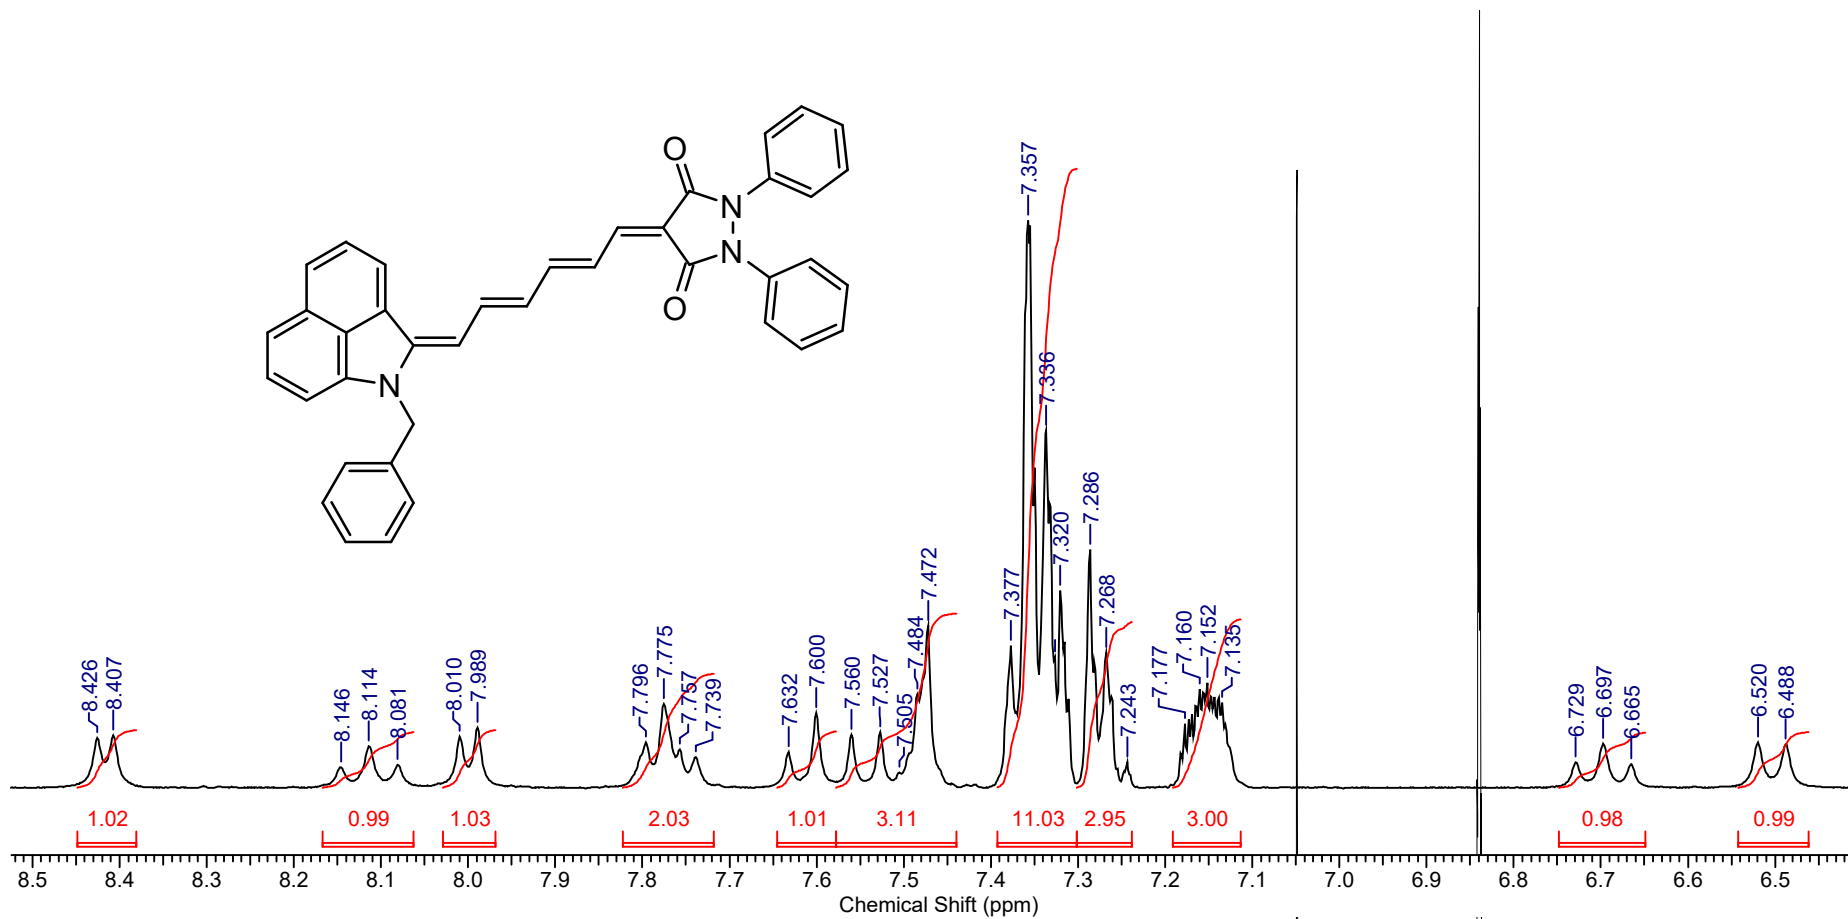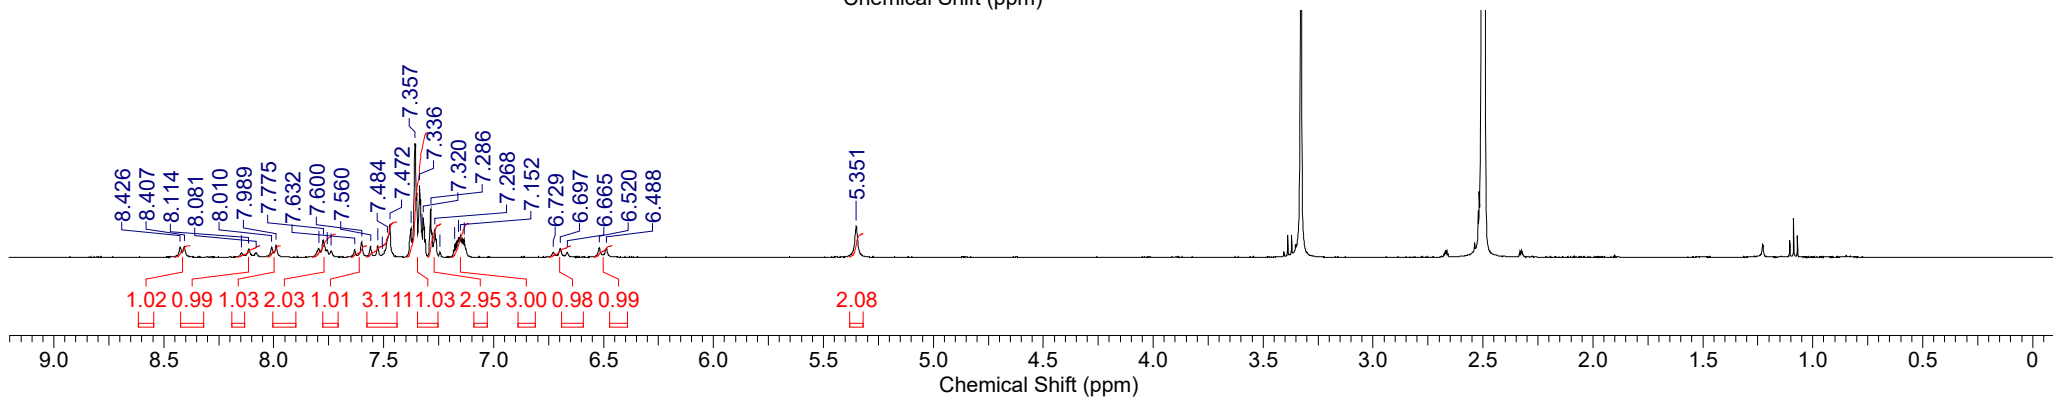



|                 |         |         |    |
|-----------------|---------|---------|----|
| Frequency (MHz) | 299.95  | Nucleus | 1H |
| Solvent         | DMSO-d6 |         |    |

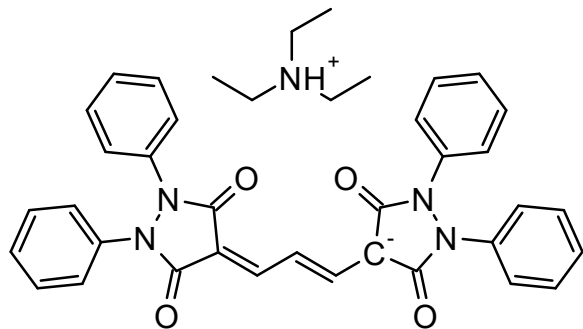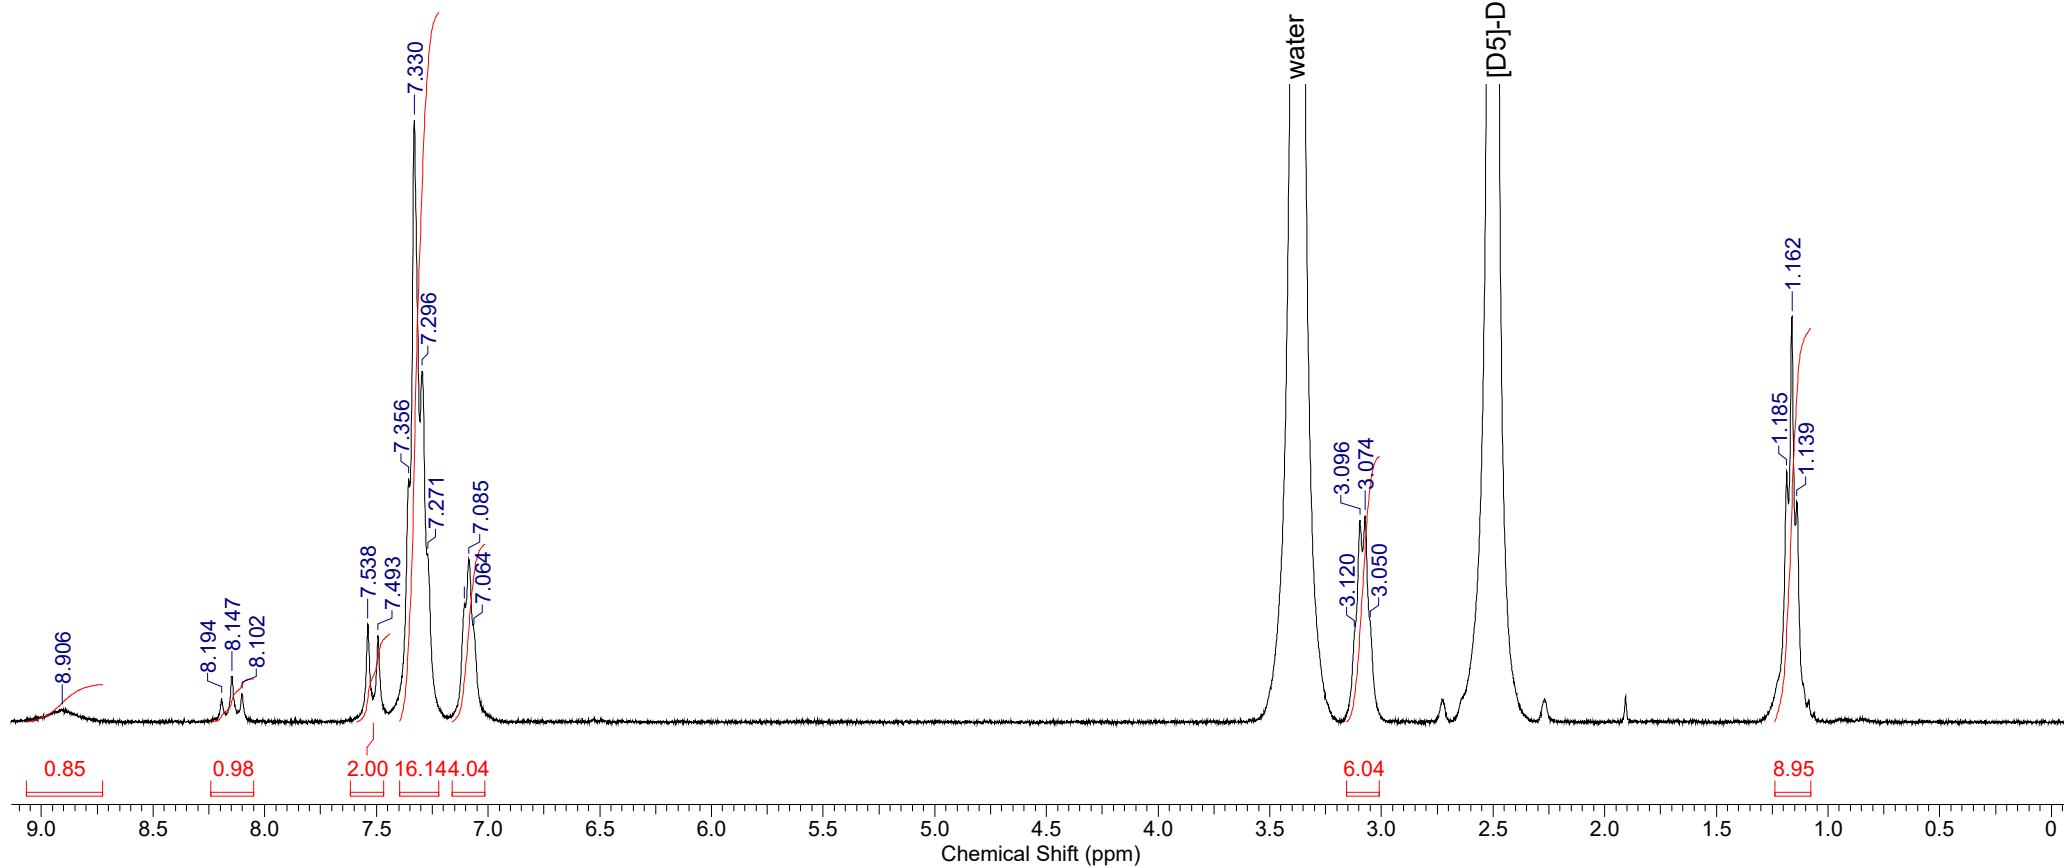

|                 |              |         |                |
|-----------------|--------------|---------|----------------|
| Frequency (MHz) | 299.95       | Nucleus | <sup>1</sup> H |
| Solvent         | CHLOROFORM-d |         |                |

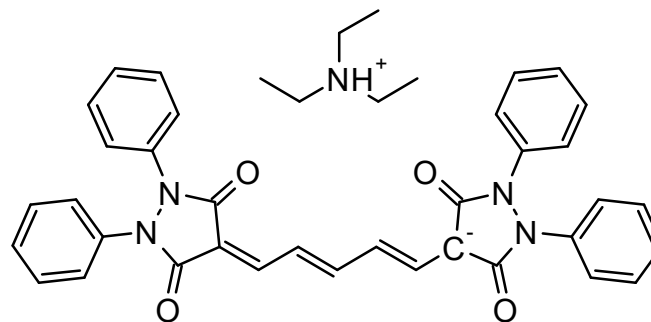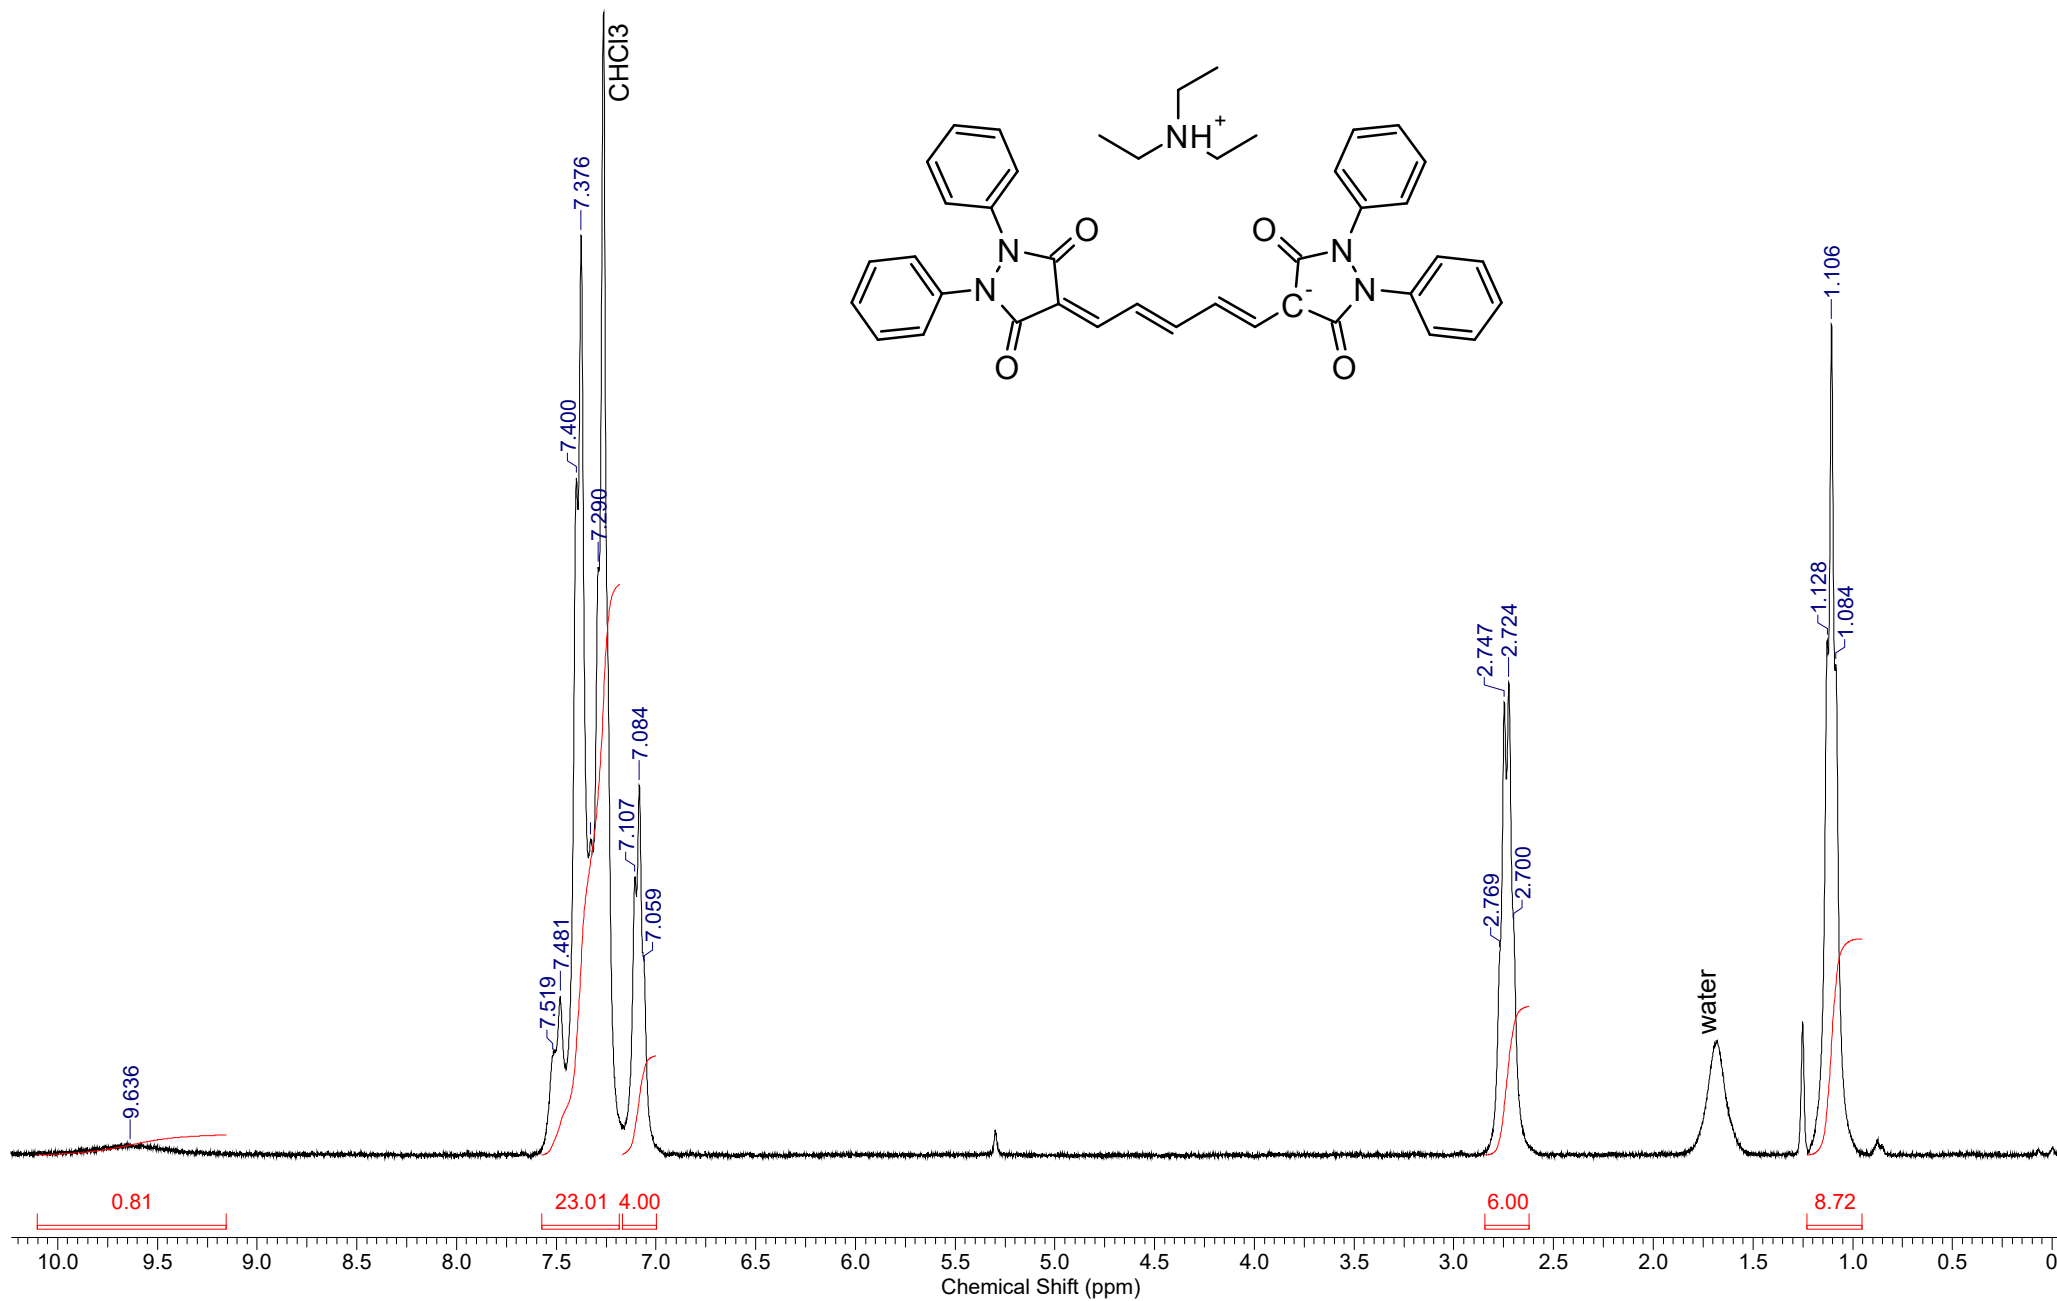

Supplement: c9nj03275d1.pdf [file c9nj03275d1.pdf]
